1 **Title:**

2 *Clostridium difficile* alters the structure and metabolism of distinct cecal microbiomes during  
3 initial infection to promote sustained colonization

4 **Authors:**

5 Matthew L. Jenior<sup>1</sup>, Jhansi L. Leslie<sup>1</sup>, Vincent B. Young<sup>1,2</sup>, and Patrick D. Schloss<sup>1\*</sup>

6 1. Department of Microbiology and Immunology, University of Michigan, Ann Arbor, Michigan

7 2. Department of Internal Medicine/Infectious Diseases Division, University of Michigan

8 Medical Center, Ann Arbor, Michigan

9

10 \* Correspondence to Patrick D. Schloss at [pschloss@umich.edu](mailto:pschloss@umich.edu)

## 11 **Abstract**

12 Susceptibility to *Clostridium difficile* infection is primarily associated with previous exposure to  
13 antibiotics, which compromise the structure and function of the gut bacterial community. Specific  
14 antibiotic classes correlate more strongly with recurrent or persistent *C. difficile* infection. As  
15 such, we utilized a mouse model of infection to explore the effect of distinct antibiotic classes on  
16 the impact that infection has on community-level transcription and metabolic signatures shortly  
17 following pathogen colonization and how those changes may associate with persistence of *C.*  
18 *difficile*. Untargeted metabolomic analysis revealed that *C. difficile* infection had significantly  
19 larger impacts on the metabolic environment across cefoperazone and streptomycin-pretreated  
20 mice, which become persistently colonized compared to clindamycin-pretreated mice where  
21 infection quickly became undetectable. Through metagenome-enabled metatranscriptomics we  
22 observed that transcripts for genes associated with carbon and energy acquisition were greatly  
23 reduced in infected animals, suggesting those niches were instead occupied by *C. difficile*.  
24 Furthermore, the largest changes in transcription were seen in the least abundant species  
25 indicating that *C. difficile* may “attack the loser” in gut environments where sustained infection  
26 occurs more readily. Overall, our results suggest that *C. difficile* is able to restructure the  
27 nutrient-niche landscape in the gut to promote persistent infection.

## 28 **Importance**

29 *Clostridium difficile* has become the most common single cause of hospital-acquired infection  
30 over the last decade in the United States. Colonization resistance to the nosocomial pathogen is  
31 primarily provided by the gut microbiota, which is also involved in clearing the infection as the  
32 community recovers from perturbation. As distinct antibiotics are associated with different risk  
33 levels for CDI, we utilized a mouse model of infection with 3 separate antibiotic pretreatment  
34 regimes to generate alternative gut microbiomes that each allowed for *C. difficile* colonization  
35 but varied in clearance rate. To assess community-level dynamics, we implemented an

36 integrative multi-omic approach that revealed that infection significantly changed many aspects  
37 of the gut community. The degree to which the community changed was inversely correlated  
38 with clearance during the first six days of infection, suggesting that *C. difficile* differentially  
39 modifies the gut environment to promote persistence. This is the first time metagenome-enabled  
40 metatranscriptomics have been employed to study the behavior of a host-associated microbiota  
41 in response to an infection. Our results allow for a previously unseen understanding of the  
42 ecology associated with *C. difficile* infection and provides groundwork for identification of  
43 context-specific probiotic therapies.

## 44 **Introduction**

45 One of the many beneficial functions provided by the indigenous gut bacterial community is its  
46 ability to protect the host from infection by pathogens (1). This attribute, termed colonization  
47 resistance, is one of the main mechanisms that protect healthy individuals from the  
48 gastrointestinal pathogen *Clostridium difficile* (2–4). *C. difficile* infection (CDI) is responsible for  
49 most cases of antibiotic-associated colitis, a toxin-mediated diarrheal disease that has  
50 dramatically increased in prevalence over the last 10 years. There are an estimated 453,000  
51 cases of CDI resulting in 29,000 deaths in the United States annually (5). Antibiotics are a major  
52 risk factor for CDI and are thought to increase susceptibility by disrupting the gut bacterial  
53 community structure; however, it is still unclear what specific changes to the microbiota  
54 contribute to this susceptibility (6, 7). Although most classes of antibiotics have been associated  
55 with initial susceptibility to CDI, fluoroquinolones, clindamycin, and cephalosporins are linked to  
56 increased risk of recurrent or persistent infection (8–10). This raises questions about the groups  
57 of bacteria that are differentially impacted by certain therapies and how these changes effect  
58 duration or severity of the infection.

59 Associations between the membership and functional capacity of the microbiota as measured  
60 by the metabolic output suggest that antibiotics increase susceptibility by altering the nutrient  
61 milieu in the gut to one that favors *C. difficile* metabolism (11–13). One hypothesis is that *C.*  
62 *difficile* colonization resistance is driven by competition for growth substrates by an intact  
63 community of metabolic specialists. This has been supported by animal model experiments over  
64 the past several decades (14–16). This line of reasoning has been carried through to the  
65 downstream restoration of colonization resistance with the application of fecal microbiota  
66 transplant (FMT). Although an individual's microbiota may not return to its precise original state  
67 following FMT, it is hypothesized that the functional capacity of the new microbiota is able to  
68 outcompete *C. difficile* for resources and clear the infection (13, 17).

69 Leveraging distinct antibiotic treatment regimens in a murine model of CDI (18), we and others  
70 have shown that *C. difficile* adapts its physiology to the distinct cecal microbiomes that resulted  
71 from exposure to antibiotics (18, 19). We went on to show that *C. difficile* appears to adapt  
72 portions of its metabolism to fit alternative nutrient niche landscapes. As the diet of the mice  
73 remained unchanged, changes in the cecal metabolome are likely driven by the intestinal  
74 microbiota. Although it has been established that *C. difficile* colonizes these communities  
75 effectively, it is unknown whether the differences in the metabolic activity of communities  
76 following antibiotic treatment are impacted by *C. difficile* colonization or if they correlate with  
77 prolonged infection. Historically, it has been difficult to ascribe specific metabolic contributions to  
78 individual taxa within the microbiota during perturbations, especially within the context of a host.  
79 To address this limited understanding, we employed an integrative untargeted metabolomic and  
80 metagenome-enabled metatranscriptomic approach to investigate specific responses to infection  
81 of the gut microbiota in a murine model of CDI. This high-dimensional analysis allowed us to not  
82 only characterize the metabolic output of the community, but to also identify which subgroups of  
83 bacteria were differentially active during mock infection and CDI. Our results supported the  
84 hypothesis that CDI was indeed associated with altered community-level gene transcription and  
85 metabolomic profile of susceptible environments. This effect was significantly more pronounced  
86 in communities where *C. difficile* was able to maintain colonization. This work highlights the  
87 need for increased appreciation of the differential, combined effects of antibiotics and CDI on  
88 the gut microbiota to develop more successful targeted therapies that eliminate *C. difficile*  
89 colonization.

## 90 Results

### 91 **Distinct antibiotic pretreatments are associated with alternative community structures** 92 **that are equally susceptible to initial *C. difficile* colonization, but differ in patterns of** 93 **clearance.**

94 We have previously shown that when conventionally-reared SPF mice were pretreated with one  
95 of three different antibiotics (streptomycin, cefoperazone, and clindamycin; Table S1), each  
96 pretreatment was associated with altered patterns of *C. difficile* virulence factor expression (19).  
97 These antibiotics were chosen for not only the ability to to reduce *C. difficile* colonization  
98 resistance in a mouse model (18), but also for distinct and significant impacts on the structure  
99 and diversity of the cecal microbiota (Fig. 1A) (19). In each antibiotic pretreatment, we observed  
100 equally high levels of *C. difficile* colonization on the day after infection, however, over the  
101 subsequent 9 days the amount of *C. difficile* in the feces of clindamycin-pretreated mice were  
102 the only mice to fall below the limit of detection, while mice receiving the other pretreatments  
103 remained highly colonized ( $p = 0.01$ ; Fig. 1A). We hypothesized that this occurred in the  
104 clindamycin-pretreated mice because the perturbed intestinal community occupied niche space  
105 that overlapped with that of *C. difficile*.

106 We chose to focus our remaining experiments on cecal samples collected 18 hours after  
107 infection to the assess behavior of *C. difficile* directly prior to the reduction in detectable *C.*  
108 *difficile*. This end point corresponded with a previous study where *C. difficile* reached maximum  
109 cecal vegetative cell load with few detectable spores (20). We also elected to examine cecal  
110 content because it was more likely to be a site of active bacterial metabolism compared to stool  
111 and would allow for an assessment of functional differences in the microbiota. At 18 hours after  
112 infection, we found that the communities remained highly differentiated from untreated controls  
113 as measured by 16S rRNA gene sequencing of the V4 region (Fig. 1B). The composition of

114 streptomycin-pretreated communities was more variable between cages, but was generally  
115 enriched for members of the *Bacteroidetes* phylum. Cefoperazone and clindamycin-pretreated  
116 cecal communities were consistently dominated by members of the *Lactobacillaceae* and  
117 *Enterobacteriaceae* families, respectively. Despite variation in the community structures, there  
118 were no significant differences in the number of vegetative cells between any antibiotic-  
119 pretreatment group (Fig. 1C). All susceptible mice were colonized with  $\sim 1 \times 10^8$  vegetative colony  
120 forming units (CFU) per gram of cecal content and untreated mice maintained *C. difficile*  
121 colonization resistance. We have also previously demonstrated that both *C. difficile* spore  
122 production and toxin activity differ between these pretreatment regimes (19). As both processes  
123 have been linked to environmental concentrations of specific growth nutrients (21), these results  
124 suggested that despite high initial *C. difficile* colonization the microbiomes across pretreatments  
125 may vary in available nutrients or profiles of competitors for those niches.

126 **Multiple biological signatures in the bacterial community and metabolome differentiated**  
127 **cecal microbiomes that remained colonized by *C. difficile* from those that did not.**

128 Pretreatment with antibiotics not only alters the structure of the resident microbiota, but also has  
129 a dramatic impact on the intestinal metabolome (11–13). To understand the ramifications each  
130 antibiotic had on the cecal metabolomic environment, we performed untargeted metabolomic  
131 analysis on the cecal contents that were also utilized in the 16S rRNA gene sequencing. We  
132 identified a total of 727 distinct metabolites. In combination with our 16S rRNA gene sequencing  
133 results, we first characterized the differences between the microbiomes (i.e. the microbiota, plus  
134 the associated metabolome) of the mock-infected animals to quantify possible drivers of  
135 communities that cleared the infection. To focus our analysis on ascertaining changes in  
136 discrete populations within the microbiota, we generated operational taxonomic units (OTUs)  
137 clustered at 97% similarity. We also removed all *C. difficile* 16S rRNA gene sequences, which  
138 represented an average of 2.113% sequencing reads across infection groups to eliminate its

139 direct impact in downstream calculation. Using these methods we discovered that the Bray-  
140 Curtis dissimilarity of both the community structure ( $p < 0.001$ ) and metabolome ( $p < 0.001$ )  
141 were significantly different between cleared and colonized groups during the early stages of  
142 infection (Fig. 2A & 2C). These results supported the hypothesis that the cecal environment  
143 created by clindamycin pretreatment was highly divergent from the other groups, and likely  
144 contributed to the clearance seen in the subsequent days.

145 To identify the populations and metabolites that were associated with sustained colonization, we  
146 utilized Random Forest machine learning with cross validation to identify the smallest optimal  
147 subset of features that could successfully differentiate microbiomes that clear infection and and  
148 those that remain colonized (22). We identified a model with 5 OTUs that correctly classified all  
149 samples to their corresponding groups (Fig. 2B; Out-of-bag error=0%). Interestingly, these  
150 OTUs were not consistently abundant in antibiotic-pretreated communities. Similarly, when we  
151 used the same approach with the metabolomic data, we identified a model that used 5  
152 metabolites that correctly differentiated the groups (Fig. 2D; Out-of-bag error=0%). Together  
153 these results further supported the hypothesis that the environment of the cecum, even early  
154 during infection, is distinct between groups that clear the infection and those that maintain *C.*  
155 *difficile* at high levels. Furthermore, results from machine learning analysis suggest that rare  
156 members of the communities had a disproportionate influence on the clearance patterns  
157 observed between pretreatment regimes and that changes in community structure may be less  
158 consistent than changes in the metatranscriptome or metabolome.

159 **Amino-acid metabolism by *C. difficile* appears important for sustained colonization**  
160 **across susceptible environments.**

161 *C. difficile*'s ability to metabolize amino acids via Stickland fermentation may be a critical  
162 nutrient niche that enables it to colonize some perturbed communities (23). We were curious  
163 whether this behavior was conserved across multiple distinct gut environments where *C. difficile*



164 was able to colonize. We assessed the changes between the antibiotic-pretreated, mock-  
165 infected microbiomes and those of untreated, *C. difficile*-resistant animals. Not only were the  
166 relative abundances of Stickland fermentation substrates increased across susceptible  
167 environments, but several secondary bile acids, which have been shown to be negatively  
168 correlated with *C. difficile* susceptibility were significantly decreased (Fig. S1D;  $p < 0.001$ ).  
169 Additionally, when we constructed a Random Forest classification model to differentiate the  
170 groups, we identified multiple members of the *Clostridia* which are capable of metabolizing  
171 amino acids for growth (24). The relative abundances of these populations were significantly  
172 lower in susceptible animals (Fig. S1B;  $p < 0.001$ ). We also performed a similar analysis to  
173 investigate changes induced by *C. difficile* colonization itself in these susceptible conditions.  
174 Although CDI alone did not induce significant shifts in the global community structure or  
175 metabolome (Fig. S2 A & C;  $p = 0.185, 0.065$ ), several features were able to discriminate  
176 infected and uninfected microbiomes with high accuracy. This analysis highlighted numerous  
177 growth substrates that are known for *C. difficile* in all pretreated mice including 6 Stickland  
178 substrates, 4 of which were proline conjugates, along with arabonate/xlyonate (Fig. S2D).  
179 Furthermore 5-aminovalerate, the most common end product of Stickland fermentation, was  
180 significantly increased during infection in almost all of the metabolomes. Inspection of these  
181 specific metabolites revealed that clindamycin pretreatment was only condition where both the  
182 inputs and outputs of Stickland fermentation were less abundant relative to the untreated mice  
183 (Fig. S3). These results strongly support Stickland fermentation as a primary nutritional strategy  
184 of *C. difficile* early in infection. Moreover, these data suggest that the degree to which the  
185 environment of the intestine is altered by infection may be linked to the ability of the pathogen to  
186 remain colonized.

187 **Infection corresponded with larger shifts in the metatranscriptomes of communities that**  
188 **allowed sustained *C. difficile* colonization.**

189 Despite the strong associations between bacterial community structure and the metabolome  
190 with colonization resistance, it was difficult to associate specific populations with changes in  
191 those metabolites that were associated with the duration of infection. To gain a more specific  
192 understanding of how the microbiota or *C. difficile* shaped the metabolic environment, we  
193 employed parallel metagenomic and metatranscriptomic shotgun sequencing of the samples  
194 collected from the cecal content of the mice used in the previous analyses. To achieve usable  
195 concentrations of bacterial mRNA after rRNA depletion, we had to pool the samples within each  
196 treatment and infection group. To establish confidence in the results of a pooled analysis, we  
197 calculated within-group sample variance among replicates using CFU, OTU relative abundance,  
198 and metabolomic relative abundance data (Table S3). These analyses revealed low levels of  
199 variance within control and experimental groups. Following sequencing, metagenomic reads  
200 from mock-infected cecal communities were assembled *de novo* into contigs and putative genes  
201 were identified resulting in 234,868 (streptomycin), 83,534 (cefoperazone), and 35,681  
202 (clindamycin) open reading frames in each metagenome. Of these putative genes, 28.5% could  
203 be annotated to a known function based on the KEGG database, and many of these  
204 annotations were homologs to genes in species that were found in our dataset. Streptomycin  
205 pretreatment resulted in a significantly more diverse community than other groups based on  
206 16S rRNA gene sequence data, so a more diverse metagenome was expected (Table S1).  
207 Supporting this prediction, 2408 unique functionally annotated genes were detected in the  
208 streptomycin pretreatment metagenome, at least 1163 more genes than were found in either the  
209 cefoperazone or clindamycin metagenomes (Fig. S4A-D). Metagenome-enabled mapping of the  
210 metatranscriptomic reads revealed that we were able to obtain informative depths of sequencing  
211 from across the metagenomic libraries (Fig. S4E-F). As expected, genes with any detectable  
212 transcript in any metatranscriptome were a subset of their corresponding metagenome.

213 Metatranscriptomic read abundances were normalized to corresponding metagenomic coverage  
214 per gene to normalize for the abundance of the contributing bacterial taxa. This step was  
215 followed by a final subsampling of reads from each conditions to control for uneven sequencing  
216 effort and to identify genes with the largest changes in transcription relative to uninfected  
217 animals.

218 We hypothesized that the degree of change in the metatranscriptome corresponding with *C.*  
219 *difficile* colonization would reflect the shifts seen at in the metabolome. As disparate bacterial  
220 taxa possess vastly different metabolic capabilities and the antibiotic pretreatments induced  
221 distinct species profiles in each community, we tested our hypothesis by delineating the  
222 transcriptomic contributions of separate bacterial taxa within each metatranscriptome. Since  
223 many genes lack a specific functional annotation in KEGG but retain general taxonomic  
224 information, we continued the analysis at the genus level of classification for all genes  
225 contributed to each metagenome. Using this approach, we directly compared the normalized  
226 transcript abundances for each gene between infected and uninfected states for each antibiotic  
227 pretreatment and calculated the Spearman correlation to identify distinct patterns of  
228 transcription (Fig. 3). This resulted in 2473 genes that had an average distance of 2.545 units of  
229 deviation (UD) associated with streptomycin-pretreatment, 2930 genes at an average distance  
230 of 3.854 UD with cefoperazone-pretreatment, and only 727 genes at an average distance of  
231 2.414 UD with clindamycin-pretreatment. Overall, the clindamycin pretreatment was associated  
232 with the fewest transcription outliers between uninfected and infection conditions compared with  
233 those of the other antibiotic groups. This suggested that the degree to which the  
234 metatranscriptome was altered by infection corresponded to prolonged colonization.

235 This analysis also revealed that outlier genes originated in underrepresented genera. In  
236 streptomycin-pretreated mice, 937 genes belonging to *Lactobacillus* that higher transcription  
237 during *C. difficile* infection; *Lactobacillus* accounted for 0.42% of the 16S rRNA gene sequences

238 (Fig. 3A). In cefoperazone-pretreated mice, 2290 genes belonging to *Bacteroides* had lower  
239 transcription during *C. difficile* infection; *Bacteroides* accounted for 1.49% of the 16S rRNA gene  
240 sequences (Fig. 3B). A consistent trend in streptomycin and cefoperazone-pretreated mice was  
241 an overrepresentation of highly transcribed genes from genera belonging to *Bacteroidetes*  
242 during mock infection. The metatranscriptomes among mice from both of these pretreatment  
243 conditions poorly correlated between mock and infected conditions, indicating a high degree of  
244 change induced by *C. difficile* colonization ( $R = 0.334$  &  $R = 0.031$ ). In clindamycin-pretreated  
245 mice the largest difference in transcription was for 510 *Lactobacillus* genes with increased  
246 transcription during CDI; *Lactobacillus* accounted for 2.7% of the 16S rRNA gene sequences  
247 (Fig. 3C). Infected and uninfected metatranscriptomes from mice pretreated with clindamycin  
248 were more strongly correlated with each other than either of the other pretreatments ( $R =$   
249  $0.864$ ). This suggests that although *C. difficile* altered the streptomycin and cefoperazone-  
250 pretreated communities in which it was able to remain stably colonized, it had minimal impact on  
251 the clindamycin-pretreated community in which it was not able to remain colonized.

252 **Largest changes in metatranscriptomes in response to infection were concentrated in**  
253 **the minority taxa of each pretreatment group.**

254 To explore the observation that rare taxa were responsible for the largest differences in  
255 transcription in response to infection, we tabulated the absolute difference between mock and  
256 *C. difficile* infected transcriptomes for each genus in each antibiotic pretreatment. We further  
257 normalized these values for the number of genes detected in each genus to adjust for genera  
258 that were more successfully assembled or annotated and we eliminated genera where less than  
259 50 genes were detected in the metatranscriptome. Taxa were then stratified into categories  
260 based on their relative abundance in each community from 16S rRNA gene sequencing (Fig. 4).  
261 This revealed that most change occurred among the rare genera and that the degree of change  
262 was inversely correlated with sustained colonization. To this point, minority metatranscriptomic

263 absolute differences were significantly reduced in clindamycin pretreatment ( $p < 0.001$ ).  
264 Additionally, the proportion of taxa in the lowest relative abundance bracket was similar across  
265 pretreatment groups (~88.9%). As a corollary, we predicted that the majority of unique genes or  
266 metabolic potential was held within this minority, and when following quantification this proved to  
267 be the case (Table S4). As a consequence, the downstream impacts on functionality may affect  
268 a disproportionately large effect on the overall environment of the intestine as a function of its  
269 collective metabolism.

270 **Altered transcription within minority taxa favors reduced nutrient competition with *C.***  
271 ***difficile* in communities that permitted sustained colonization.**

272 Based on our metabolomic and metatranscriptomic results, we hypothesized that pathways with  
273 the greatest differences between mock and *C. difficile*-infected mice would be related to  
274 catabolism of metabolites that *C. difficile* could use for growth. To assess these changes, we  
275 identified those annotated transcripts that were associated with genera that represented less  
276 than 0.1% of the community as measured with our 16S rRNA gene sequence data (Fig. 5). This  
277 resulted in the identification of 585 genes that were differentially transcribed between  
278 clindamycin-pretreated mice and the streptomycin and cefoperazone-pretreated mice. From this  
279 group of genes we filtered the collection to identify those genes that were unique to either the  
280 clindamycin-pretreated mice or the streptomycin and cefoperazone-pretreated mice. Finally, we  
281 limited our analysis to those genes that were meaningfully different between the mock and *C.*  
282 *difficile*-infected groups in each antibiotic pretreatment group. This resulted in 34 genes from 11  
283 pathways. These genes and pathways were primarily involved in simple carbohydrate-  
284 containing molecule acquisition/utilization (Fig. 5). Interestingly, many of these genes had  
285 decreased transcription during infection compared to mock-infected controls. At the pathway-  
286 level, many genes associated with galactose and amino sugar acquisition (both *C. difficile*  
287 growth substrates) were reduced during infection in both streptomycin and cefoperazone-

288 pretreated mice. Conversely, pathways uniquely associated with clindamycin-pretreated  
289 communities were related to the metabolism of a diverse array of carbon sources, which may  
290 indicate ineffective competition by *C. difficile* with this community for any particular growth  
291 substrate. Our results indeed suggest that *C. difficile* colonization induces a shift transcriptional  
292 activity for a minority subset of species, possibly in an effort to segregate a desired nutrient  
293 niche, prior to the introduction of the hallmark disease phenotypes associated with CDI.

## 294 Discussion

295 Our results demonstrate that distinct intestinal ecosystems are differentially impacted by *C.*  
296 *difficile* colonization and that these changes to community metabolism could have implications  
297 for the ability of the pathogen to persist in those environments. Furthermore, our mutli-omics  
298 approach demonstrated that *C. difficile* manipulated the niche landscape of the intestinal tract.  
299 Instances of active nutrient niche restructuring in the gut have been documented previously for  
300 prominent symbiotic bacterial species in gnotobiotic mice (25), but not in a conventionally-  
301 reared animal model of infection following antibiotic pretreatment. Interestingly, the taxonomic  
302 groups that produced the transcripts that were most altered by *C. difficile* colonization were rare  
303 in their cecal community. Previous studies have found that rare taxonomic groups, even those  
304 at a low abundance as a result of a spontaneous perturbation, may have disproportionate  
305 effects on the metabolome of the rest of the community (26). For example, in temperate lakes  
306 conditionally rare microbes were found to be far more metabolically active than highly abundant  
307 taxa (27). These examples of response to perturbations are interesting models for thinking  
308 about the dynamics of bacterial populations recovering from an antibiotic perturbation. As such,  
309 *C. difficile* may compete with these organisms to ultimately affect greater change to the entire  
310 ecosystem and open a long-lasting nutrient niche. While this hypothesis requires further  
311 exploration, it provides an ecological framework to study the interactions between *C. difficile* and  
312 members of susceptible communities.

313 This study is one of the first *in vivo* observations that a medically relevant bacterial pathogen  
314 may alter the metabolic activity of a host-associated community to promote its own colonization.  
315 This is also the first application of metatranscriptomic analysis of the gut microbiota *in vivo* and  
316 in response to a pathogen. Other groups have identified potential metabolite markers of *C.*  
317 *difficile* infection in patient feces (28), but they were not able to identify associations with  
318 changes in community metabolism that were afforded to us by our paired metabolomic and

319 metatranscriptomic analyses. In a recent study, a tick-vectored bacterial pathogen altered the  
320 ability of the resident microbiota of the tick by interrupting proper biofilm formation and allowing  
321 lasting colonization (29). It was also recently found that bacterial metabolic generalists may be  
322 more likely to actively antagonize the growth of other species in an environment that they are  
323 colonizing (30). We previously showed that *C. difficile* has a wide nutrient niche-space *in vivo*  
324 and most likely utilizes its role as a metabolic generalist to colonize diverse gut microbiomes  
325 (19). The ability to simultaneously antagonize the metabolism of surrounding populations in  
326 cecal environments that support persistence would explain the more significant shifts in those  
327 metatranscriptome. While we acknowledge that this study may not elucidate the specific  
328 mechanism by which this interaction occurs, the combined systems analysis strengthens each  
329 individual level of observation. When the results from these approaches are combined reveals a  
330 clearer understanding of *C. difficile*-related microbial ecology. This research lays the  
331 groundwork for a more rationale consideration of the metabolic functionalities of bacterial taxa to  
332 consider when attempting to rebuild *C. difficile* colonization resistance across differentially  
333 perturbed gut environments.

334 In spite of consistent results across the different methods we used in this study, several  
335 limitations should be noted. First, as with all transcriptomic studies, the relative level of mRNA  
336 detected for a given gene does not necessarily reflect the amount of functional protein made by  
337 a cell or the post-translational modifications that are required to activate the enzymes.  
338 Additionally, due to the low relative abundance of *C. difficile* in these communities, it was  
339 necessary for us to pool samples to generate a large number of reads from each group rather  
340 than sampling multiple replicates within each group. Greater transcript read abundance per  
341 gene allowed for improved survey for the activity of lowly abundant species as well as greater  
342 confidence in genes found to be highly transcribed. Although the lack of animal-based  
343 replication for the metatranscriptomic data does potentially limit the ability to generalize our



344 results, this approach has been successfully utilized by numerous groups in the past to  
345 accurately characterize transcriptionally activity across communities of bacteria (19, 31–33).  
346 Furthermore, the metatranscriptomic data were supported by the 16S rRNA gene sequence and  
347 metabolomic data which were collected from individual animals. With respect to the  
348 metabolomic data, alternative interpretations of the data also exist. For example, we assumed  
349 that metabolites, which did not change in concentration between uninfected and infected  
350 conditions were not impacted by *C. difficile* colonization. However, it is possible that the  
351 metabolism of *C. difficile* itself simply substituted for a function that was already present in the  
352 uninfected community. The insights gathered from the metatranscriptomic data suggests that  
353 this was unlikely. By leveraging multiple methods to test our hypotheses we were able to  
354 mediate the weaknesses of any individual method and present a more unified description of the  
355 system than any of the methods on their own.

356 Our study supports the hypothesis that the gut microbiota of healthy individuals maintains  
357 colonization resistance to *C. difficile* by outcompeting the pathogen for preferred nutrient niche  
358 space. Ultimately, our results suggest that each susceptible and subsequently infected  
359 microbiome may be unique and require specific microbes or functionalities to restore  
360 colonization resistance against *C. difficile* in that specific context. Conversely, colonization  
361 resistance against *C. difficile* may be the result of contributions by distinct sub-communities of  
362 bacteria across each unique resistant gut community. Several studies have attempted to identify  
363 single bacterial species or consortia that are able to achieve colonization resistance; however,  
364 these efforts have only resulted in partially resistance (34–37). Considering the structure and  
365 function of the microbiome is intimately connected to colonization resistance against the *C.*  
366 *difficile*, it has become imperative to understand the ecological factors that allow some gut  
367 environments to be persistently colonized while others are not. This research lays the  
368 groundwork for future studies to assess context dependent restoration of *C. difficile* colonization

369 resistance and what factors are able to interfere with the ability of *C. difficile* to modify gut  
370 ecology to promote clearance.

## 371 **Materials and Methods**

### 372 **Animal care and antibiotic administration.**

373 Briefly, approximately equal numbers of male and female conventionally-reared six-to-eight  
374 week-old C57BL/6 mice were randomly assigned to each experimental group (genders were  
375 housed separately). Nine mice were used in each experimental and control group. They were  
376 administered one of three antibiotics; cefoperazone, streptomycin, or clindamycin before oral *C.*  
377 *difficile* infection (Table S1). A detailed description of these animal models was outlined  
378 previously (19). A similar experimental design was implemented for gnotobiotic mice and was  
379 performed with the University of Michigan Germfree Mouse Center as described previously (19).  
380 All animal protocols were approved by the University Committee on Use and Care of Animals at  
381 the University of Michigan and carried out in accordance with the approved guidelines from the  
382 Office of Laboratory Animal Welfare (OLAW), United States Department of Agriculture (USDA)  
383 registration, and the Association for Assessment and Accreditation of Laboratory Animal Care  
384 (AAALAC). The protocol license Institutional Animal Care and Use Committee (IACUC) number  
385 for all described experiments is PRO00006983.

### 386 ***C. difficile* infection and necropsy**

387 On the day of challenge,  $1 \times 10^3$  *C. difficile* spores were administered to mice via oral gavage in  
388 phosphate-buffered saline (PBS) vehicle. Mock-infected animals were given an oral gavage of  
389 100 ul PBS at the same time as those mice administered *C. difficile* spores. 18 hours following  
390 infection, mice were euthanized by CO<sub>2</sub> asphyxiation and necropsied to obtain the cecal  
391 contents. Aliquots were immediately flash frozen for later DNA extraction and toxin titer analysis.  
392 A third aliquot was transferred to an anaerobic chamber for quantification of *C. difficile*  
393 abundance. The remaining content in the ceca was mixed in a stainless steel mortar housed in  
394 a dry ice and ethanol bath. Cecal contents from all mice within each pretreatment group were

395 pooled into the mortar prior to grinding to a fine powder. The ground content was then stored at  
396 -80°C for subsequent RNA extraction. For 10-day colonization studies, fresh stool was collected  
397 from infected mice each day beginning on the day of infection. Mice were monitored for overt  
398 signs of disease and were euthanized after the final stool collection.

### 399 ***C. difficile* cultivation and quantification**

400 Cecal samples were weighed and serially diluted under anaerobic conditions with anaerobic  
401 PBS. Differential plating was performed to quantify *C. difficile* vegetative cells by plating diluted  
402 samples on CCFAE plates (fructose agar plus cycloserine, ceftiofur, and erythromycin) at 37°C  
403 for 24 hours under anaerobic conditions (38). Quantification of total *C. difficile* CFU for the 10-  
404 day colonization experiments was performed from stool using TCCFAE to measure total *C.*  
405 *difficile* load in these animals over time.

### 406 **DNA/RNA extraction and sequencing library preparation**

407 DNA for shotgun metagenomic and 16S rRNA gene sequencing was extracted from  
408 approximately 50 mg of cecal content from each mouse using the PowerSoil-htp 96 Well Soil  
409 DNA isolation kit (MO BIO Laboratories) and an epMotion 5075 automated pipetting system  
410 (Eppendorf). The V4 region of the bacterial 16S rRNA gene was amplified using custom  
411 barcoded primers (39). Equal molar ratios of raw isolated DNA within each treatment group  
412 were then pooled and ~2.5 ng of material was used to generate shotgun libraries with a  
413 modified 10-cycle Nextera XT genomic library construction protocol (Illumina). This was done to  
414 mimic the pooling strategy necessary for metatranscriptomic library preparation. Final libraries  
415 were pooled at equal molar ratios and stored at -20°C. For RNA extraction, a more detailed  
416 description of the procedure can be found in (19). Briefly, immediately before RNA extraction, 3  
417 ml of lysis buffer (2% SDS, 16 mM EDTA and 200 mM NaCl) contained in a 50 ml  
418 polypropylene conical tube was heated for 5 minutes in a boiling water bath (40). The hot lysis

419 buffer was added to the frozen and ground cecal content. The mixture was boiled with periodic  
420 vortexing for another 5 minutes. After boiling, an equal volume of 37°C acid phenol/chloroform  
421 was added to the cecal content lysate and incubated at 37°C for 10 minutes with periodic  
422 vortexing. The mixture was centrifuged at 2,500 x g at 4°C for 15 minutes. The aqueous  
423 phase was then transferred to a sterile tube and an equal volume of acid phenol/chloroform was  
424 added. This mixture was vortexed and centrifuged at 2,500 x g at 4°C for 5 minutes. The  
425 process was repeated until aqueous phase was clear. The last extraction was performed with  
426 chloroform/isoamyl alcohol to remove acid phenol. An equal volume of isopropanol was added  
427 and the extracted nucleic acid was incubated overnight at -20°C. The following day the sample  
428 was centrifuged at 12000 x g at 4°C for 45 minutes. The pellet was washed with 0°C 100%  
429 ethanol and resuspended in 200 ul of RNase-free water. Following the manufacturer's protocol,  
430 samples were then treated with 2 ul of Turbo DNase for 30 minutes at 37°C. RNA samples were  
431 retrieved using the Zymo Quick-RNA MiniPrep according the manufacturer's protocol. The Ribo-  
432 Zero Gold rRNA Removal Kit (Epidemiology) was then used to deplete prokaryotic and  
433 eukaryotic rRNA from the samples according the manufacturer's protocol (Illumina). Stranded  
434 RNA-Seq libraries were made constructed with the TruSeq Total RNA Library Preparation Kit  
435 v2, both using the manufacturer's protocol. Completed libraries were stored at -20°C until time  
436 of sequencing.

#### 437 **High-throughput sequencing and raw read curation**

438 Sequencing of 16S rRNA gene amplicon libraries was performed using an Illumina MiSeq  
439 sequencer as described previously (39). The 16S rRNA gene sequences were curated using the  
440 mothur software package (v1.36) and OTU-based analysis was performed as described in (19).  
441 Genus-level classification-based analysis of 16S rRNA gene sequence data was accomplished  
442 using the phylotype workflow in mothur and the full SILVA bacterial taxonomy (release 132).  
443 Shotgun metagenomic sequencing was performed in 2 phases. Libraries from mock-infected

444 communities, which were also to be utilized for *de novo* contig assembly, were sequenced using  
445 an Illumina HiSeq 2500 on 2x250 paired-end settings and was repeated across 2 lanes to  
446 normalize for inter-run variation. *C. difficile*-infected metagenomic libraries were sequenced with  
447 an Illumina NextSeq 300 with 2x150 settings across 2 runs to also normalize for inter-run  
448 variation. These efforts resulted in an average of 280,000,000 paired raw reads per sample.  
449 Metatranscriptomic sequencing was performed on an Illumina HiSeq 2500 with 2x50 settings  
450 and was repeated across 4 lanes for normalization and to normalize for technical variation  
451 between lanes and to obtain necessary coverage (32). This gave an average of 380 million raw  
452 cDNA reads per library. Both metagenomic and metatranscriptomic sequencing was performed  
453 at the University of Michigan Sequencing Core. Raw sequence read curation for both  
454 metagenomic and metatranscriptomic datasets was performed in a two step process. Residual  
455 5' and 3' Illumina adapter sequences were trimmed using CutAdapt (41) on a per library basis.  
456 Reads were quality trimmed using Sickle (42) with a quality cutoff of Q30. This resulted in  
457 approximately 270 million reads per library (both paired and orphaned) for both metagenomic  
458 and metatranscriptomic sequencing. Actual read abundances for individual metagenomic and  
459 metatranscriptomic sequencing efforts can be found in Table S4.

#### 460 **Metagenomic contig assembly and gene annotation**

461 Metagenomic contigs were assembled using Megahit (43) with the following settings: minimum  
462 kmer size of 87, maximum kmer size of 127, and a kmer step size of 10. Prodigal was utilized to  
463 to identify putative gene sequences, and were screened for a minimum length of 250  
464 nucleotides. These sequences were translated to amino acids and the predicted peptides were  
465 annotated based on the KEGG protein database (44) using Diamond implementation of  
466 BLASTp (45). Peptide-level gene annotations were assigned to the corresponding nucleotide  
467 sequence, and genes failing to find a match in KEGG were preserved as unannotated genes.

468 Final nucleotide FASTA files with KEGG annotations were then utilized in the construction of  
469 Bowtie2 mapping databases from downstream analyses (46).

#### 470 **DNA/cDNA read mapping and normalization**

471 Mapping of DNA and cDNA reads to the assemblies was accomplished using Bowtie2 and the  
472 default stringent settings (46). Optical and PCR duplicates were then removed using Picard  
473 MarkDuplicates (<http://broadinstitute.github.io/picard/>). The remaining mappings were converted  
474 to idxstats format using Samtools (47) and the read counts per gene were tabulated. Discordant  
475 pair mappings were discarded and counts were then normalized to read length and gene length  
476 to give a per base report of gene coverage. Transcript abundance was then normalized to gene  
477 abundance to yield overall level of transcription for each gene. Reads contributed by *C. difficile*  
478 were removed from analysis using Bowtie2 against the *C. difficile* str. 630 genome with settings  
479 allowing for up to 2 mismatches.X

#### 480 **Quantification of *in vivo* metabolite relative concentrations**

481 Metabolomic analysis was performed by Metabolon (Durham, NC), for a detailed description of  
482 the procedure refer to (19). Briefly, all methods utilized a Waters ACQUITY ultra-performance  
483 liquid chromatography (UPLC) and a Thermo Scientific Q-Exactive high resolution/accurate  
484 mass spectrometer interfaced with a heated electrospray ionization (HESI-II) source and  
485 Orbitrap mass analyzer at 35,000 mass resolution. Samples were dried then reconstituted in  
486 solvents compatible to each of the four methods. The first, in acidic positive conditions using a  
487 C18 column (Waters UPLC BEH C18-2.1x100 mm, 1.7  $\mu$ m) using water and methanol,  
488 containing 0.05% perfluoropentanoic acid (PFPA) and 0.1% formic acid (FA). The second  
489 method was identical to the first but was chromatographically optimized for more hydrophobic  
490 compounds. The third approach utilized a basic negative ion optimized conditions using a  
491 separate dedicated C18 column. Basic extracts were gradient eluted from the column using

492 methanol and water, however with 6.5mM Ammonium Bicarbonate at pH 8. Samples were then  
493 analyzed via negative ionization following elution from a hydrophilic interaction chromatography  
494 column (Waters UPLC BEH Amide 2.1x150 mm, 1.7 um) using a gradient consisting of water  
495 and acetonitrile with 10 mM Ammonium Formate, pH 10.8. The MS analysis alternated between  
496 MS and data-dependent MS n scans using dynamic exclusion. The scan range varied slightly  
497 between methods but covered 70-1000 m/z. Library matches for each compound were checked  
498 for each sample and corrected if necessary.

#### 499 **Statistical methods**

500 All statistical analyses were performed using R (v.3.2.0) and the vegan package (48). Significant  
501 differences of inverse Simpson diversity, CFU, toxin titer, and metabolite concentrations were  
502 determined by Wilcoxon signed-rank test with Benjamini-Hochberg correction using a study-  
503 wide Type I error rate of 0.05. Undetectable points used half the limit of detection for CFU and  
504 toxin statistical calculations. Dynamic time warping was performed with the dtw package in R  
505 (49). Random forest was performed using the AUCRF implementation (22) as well as the  
506 standard package (50) in R. Distances of outlier points from center line during  
507 metatranscriptomic comparisons was accomplished using 2-dimensional linear geometry.

#### 508 **Data Availability**

509 Pooled and quality trimmed *C. difficile*-infected metatranscriptomes (SRA; PRJNA354635) and  
510 16S rRNA gene amplicon read data (SRA; PRJNA383577) from infection experiments are  
511 available through the NCBI Sequence Read Archive. Metagenomic reads and mock-infected  
512 metatranscriptomic reads can be found also on the SRA (PRJNA415307). Data processing  
513 steps beginning with raw sequence data to the final manuscript are hosted at  
514 [https://github.com/SchlossLab/Jenior\\_Metatranscriptomics\\_mSphere\\_2018.X](https://github.com/SchlossLab/Jenior_Metatranscriptomics_mSphere_2018.X)



515 **Acknowledgments**

516 The authors would like to acknowledge Charles Koumpouras for assistance with DNA  
517 extractions and metabolomic sample preparation. We would also like to acknowledge members  
518 of the University of Michigan Germfree Mouse Center, University of Michigan Sequencing Core,  
519 and Metabolon for their assistance in experimental design, execution, and data collection.

520 **Author Contributions**

521 M.L.J. conceived, designed and performed experiments, analyzed data, and drafted the  
522 manuscript. J.L.L. performed experiments, analyzed data, and contributed to the manuscript.  
523 V.B.Y. contributed to the manuscript. P.D.S. interpreted data and contributed the manuscript.  
524 The authors declare no conflicts of interest.

## 525 **References**

- 526 1. **Vollaard, E. J., and H. A. L. Clasener.** 1994. Colonization resistance. U.S. Patent 3.
- 527 2. **Freter, R.** 1955. The Fatal Enteric Cholera Infection in the Guinea Pig, Achieved by Inhibition  
528 of Normal Enteric Flora. *The Journal of Infectious Diseases* **97**:57–65.
- 529 3. **Fekety, R., J. Silva, R. Toshniwal, M. Allo, J. Armstrong, R. Browne, J. Ebright, and G.**  
530 **Rifkin.** 1979. Antibiotic-associated colitis: Effects of antibiotics on clostridium difficile and the  
531 disease in hamsters. *Reviews of Infectious Diseases* **1**:386–397.
- 532 4. **Britton, R. A., and V. B. Young.** 2012. Interaction between the intestinal microbiota and host  
533 in Clostridium difficile colonization resistance. *Trends in microbiology* **20**:313–9.
- 534 5. **Lessa, F. C., Y. Mu, W. M. Bamberg, Z. G. Beldavs, G. K. Dumyati, J. R. Dunn, M. M.**  
535 **Farley, S. M. Holzbauer, J. I. Meek, E. C. Phipps, L. E. Wilson, L. G. Winston, J. A. Cohen,**  
536 **B. M. Limbago, S. K. Fridkin, D. N. Gerding, and L. C. McDonald.** 2015. Burden of  
537 Clostridium difficile Infection in the United States. *New England Journal of Medicine* **372**:825–  
538 834.
- 539 6. **Antonopoulos, D. A., S. M. Huse, H. G. Morrison, T. M. Schmidt, M. L. Sogin, and V. B.**  
540 **Young.** 2009. Reproducible community dynamics of the gastrointestinal microbiota following  
541 antibiotic perturbation. *Infection and Immunity* **77**:2367–2375.
- 542 7. **Buffie, C. G., I. Jarchum, M. Equinda, L. Lipuma, A. Gobourne, A. Viale, C. Ubeda, J.**  
543 **Xavier, and E. G. Pamer.** 2012. Profound alterations of intestinal microbiota following a single  
544 dose of clindamycin results in sustained susceptibility to Clostridium difficile-induced colitis.  
545 *Infection and Immunity* **80**:62–73.
- 546 8. **Thomas, C., M. Stevenson, and T. V. Riley.** 2003. Antibiotics and hospital-acquired  
547 Clostridium difficile-associated diarrhoea: A systematic review **51**:1339–1350.

- 548 9. **Brown, K. A., N. Khanafer, N. Daneman, and D. N. Fisman.** 2013. Meta-analysis of  
549 antibiotics and the risk of community-associated *Clostridium difficile* infection. *Antimicrobial*  
550 *Agents and Chemotherapy* **57**:2326–2332.
- 551 10. **Bignardi, G.** 1998. Risk factors for *Clostridium difficile* infection. *Journal of Hospital*  
552 *Infection* **40**:1–15.
- 553 11. **Antunes, L. C. M., J. Han, R. B. R. Ferreira, P. Loli, C. H. Borchers, and B. B. Finlay.**  
554 2011. Effect of antibiotic treatment on the intestinal metabolome. *Antimicrobial Agents and*  
555 *Chemotherapy* **55**:1494–1503.
- 556 12. **Jump, R. L. P., A. Polinkovsky, K. Hurless, B. Sitzlar, K. Eckart, M. Tomas, A.**  
557 **Deshpande, M. M. Nerandzic, and C. J. Donskey.** 2014. Metabolomics analysis identifies  
558 intestinal microbiota-derived biomarkers of colonization resistance in clindamycin-treated mice.  
559 *PLoS ONE* **9**.
- 560 13. **Theriot, C. M., M. J. Koenigsnecht, P. E. Carlson, G. E. Hatton, A. M. Nelson, B. Li, G.**  
561 **B. Huffnagle, J. Z Li, and V. B. Young.** 2014. Antibiotic-induced shifts in the mouse gut  
562 microbiome and metabolome increase susceptibility to *Clostridium difficile* infection. *Nature*  
563 *communications* **5**:3114.
- 564 14. **Wilson, K. H., and F. Perini.** 1988. Role of competition for nutrients in suppression of  
565 *Clostridium difficile* by the colonic microflora. *Infection and Immunity* **56**:2610–2614.
- 566 15. **Sambol, S. P., M. M. Merrigan, J. K. Tang, S. Johnson, and D. N. Gerding.** 2002.  
567 Colonization for the Prevention of *Clostridium difficile* Disease in Hamsters. *The Journal of*  
568 *infectious diseases* **186**:14–16.
- 569 16. **Perez-Cobas, A. E., A. Artacho, S. J. Ott, A. Moya, M. J. Gosalbes, and A. Latorre.**  
570 2014. Structural and functional changes in the gut microbiota associated to *Clostridium difficile*  
571 infection. *Frontiers in Microbiology* **5**.

- 572 17. **Zaura, E., B. W. Brandt, M. J. T. de Mattos, M. J. Buijs, M. P. M. Caspers, M. U. Rashid,**  
573 **A. Weintraub, C. E. Nord, A. Savell, Y. Hu, A. R. Coates, M. Hubank, D. A. Spratt, M.**  
574 **Wilson, B. J. F. Keijser, and W. Crielaard.** 2015. Same Exposure but two radically different  
575 responses to antibiotics: Resilience of the salivary microbiome versus long-term microbial shifts  
576 in feces. *mBio* **6**.
- 577 18. **Schubert, A. M., H. Sinani, and P. D. Schloss.** 2015. Antibiotic-induced alterations of the  
578 murine gut microbiota and subsequent effects on colonization resistance against *Clostridium*  
579 *difficile*. *mBio* **6**.
- 580 19. **Jenior, M. L., J. L. Leslie, V. B. Young, and P. D. Schloss.** 2017. *Clostridium difficile*  
581 colonizes alternative nutrient niches during infection across distinct murine gut microbiomes.  
582 *mSystems*. American Society for Microbiology Journals **2**.
- 583 20. **Koenigsknecht, M. J., C. M. Theriot, I. L. Bergin, C. A. Schumacher, P. D. Schloss, and**  
584 **V. B. Young.** 2015. Dynamics and establishment of *Clostridium difficile* infection in the murine  
585 gastrointestinal tract. *Infection and Immunity* **83**:934–941.
- 586 21. **Bouillaut, L., T. Dubois, A. L. Sonenshein, and B. Dupuy.** 2015. Integration of  
587 metabolism and virulence in *Clostridium difficile*. *Research in Microbiology* **166**:375–383.
- 588 22. **Calle, M. L., V. Urrea, A. L. Boulesteix, and N. Malats.** 2011. AUC-RF: A new strategy for  
589 genomic profiling with random forest. *Human Heredity* **72**:121–132.
- 590 23. **Fletcher, J. R., S. Erwin, C. Lanzas, and C. M. Theriot.** 2018. Shifts in the Gut  
591 Metabolome and *Clostridium difficile* Transcriptome throughout Colonization and Infection in a  
592 Mouse Model. *mSphere* **3**(2).
- 593 24. **Dai, Z., Z. Wu, S. Hang, W. Zhu, and G. Wu.** 2015. Amino acid metabolism in intestinal  
594 bacteria and its potential implications for mammalian reproduction. *Molecular human*  
595 *reproduction* **21**:389–409.

- 596 25. **Mahowald, M. A., F. E. Rey, H. Seedorf, P. J. Turnbaugh, R. S. Fulton, A. Wollam, N.**  
597 **Shah, C. Wang, V. Magrini, R. K. Wilson, B. L. Cantarel, P. M. Coutinho, B. Henrissat, L.**  
598 **W. Crock, A. Russell, N. C. Verberkmoes, R. L. Hettich, and J. I. Gordon.** 2009.  
599 Characterizing a model human gut microbiota composed of members of its two dominant  
600 bacterial phyla. *Proceedings of the National Academy of Sciences* **106**:5859–5864.
- 601 26. **Jousset, A., C. Bienhold, A. Chatzinotas, L. Gallien, A. Gobet, V. Kurm, K. Küsel, M. C.**  
602 **Rillig, D. W. Rivett, J. F. Salles, M. G. A. van der Heijden, N. H. Youssef, X. Zhang, Z. Wei,**  
603 **and W. H. G. Hol.** 2017. Where less may be more: how the rare biosphere pulls ecosystems  
604 strings. *The ISME Journal*.
- 605 27. **Shade, A., S. E. Jones, J. Gregory Caporaso, J. Handelsman, R. Knight, N. Fierer, and**  
606 **J. A. Gilbert.** 2014. Conditionally rare taxa disproportionately contribute to temporal changes in  
607 microbial diversity. *mBio* **5**.
- 608 28. **Rojo, D., M. J. Gosalbes, R. Ferrari, A. E. Pérez-Cobas, E. Hernández, R. Oltra, J.**  
609 **Buesa, A. Latorre, C. Barbas, M. Ferrer, and A. Moya.** 2015. *Clostridium difficile*  
610 heterogeneously impacts intestinal community architecture but drives stable metabolome  
611 responses. *The ISME Journal* **9**:2206–2220.
- 612 29. **Abraham, N. M., L. Liu, B. L. Jutras, A. K. Yadav, S. Narasimhan, V. Gopalakrishnan, J.**  
613 **M. Ansari, K. K. Jefferson, F. Cava, C. Jacobs-Wagner, and E. Fikrig.** 2017. Pathogen-  
614 mediated manipulation of arthropod microbiota to promote infection. *Proceedings of the National*  
615 *Academy of Sciences* 201613422.
- 616 30. **Russel, J., H. Roder, J. Madsen, M. Burmell, and S. Soresen.** 2017. Antagonism  
617 correlates with metabolic similarity in diverse bacteria. *PNAS*.

- 618 31. **Sheik, C. S., S. Jain, and G. J. Dick.** 2014. Metabolic flexibility of enigmatic SAR324  
619 revealed through metagenomics and metatranscriptomics. *Environmental Microbiology* **16**:304–  
620 317.
- 621 32. **Franzosa, E. A., X. C. Morgan, N. Segata, L. Waldron, J. Reyes, A. M. Earl, G.**  
622 **Giannoukos, M. R. Boylan, D. Ciulla, D. Gevers, J. Izard, W. S. Garrett, A. T. Chan, and C.**  
623 **Huttenhower.** 2014. Relating the metatranscriptome and metagenome of the human gut.  
624 *Proceedings of the National Academy of Sciences* **111**:E2329–E2338.
- 625 33. **Jorth, P., K. H. Turner, P. Gumus, N. Nizam, N. Buduneli, and M. Whiteley.** 2014.  
626 Metatranscriptomics of the human oral microbiome during health and disease. *mBio* **5**.
- 627 34. **Reeves, A. E., M. J. Koenigsnecht, I. L. Bergin, and V. B. Young.** 2012. Suppression of  
628 *Clostridium difficile* in the gastrointestinal tracts of germfree mice inoculated with a murine  
629 isolate from the family Lachnospiraceae. *Infection and Immunity* **80**:3786–3794.
- 630 35. **Lawley, T. D., S. Clare, A. W. Walker, M. D. Stares, T. R. Connor, C. Raisen, D.**  
631 **Goulding, R. Rad, F. Schreiber, C. Brandt, L. J. Deakin, D. J. Pickard, S. H. Duncan, H. J.**  
632 **Flint, T. G. Clark, J. Parkhill, and G. Dougan.** 2012. Targeted Restoration of the Intestinal  
633 Microbiota with a Simple, Defined Bacteriotherapy Resolves Relapsing *Clostridium difficile*  
634 Disease in Mice. *PLoS Pathogens* **8**.
- 635 36. **Petrof, E. O., G. B. Gloor, S. J. Vanner, S. J. Weese, D. Carter, M. C. Daigneault, E. M.**  
636 **Brown, K. Schroeter, and E. Allen-Vercoe.** 2013. Stool substitute transplant therapy for the  
637 eradication of *Clostridium difficile* infection: ‘RePOOPulating’ the gut. *Microbiome* **1**:3.
- 638 37. **Buffie, C. G., V. Bucci, R. R. Stein, P. T. McKenney, L. Ling, A. Gobourne, D. No, H.**  
639 **Liu, M. Kinnebrew, A. Viale, E. Littmann, M. R. M. van den Brink, R. R. Jenq, Y. Taur, C.**  
640 **Sander, J. R. Cross, N. C. Toussaint, J. B. Xavier, and E. G. Pamer.** 2014. Precision

- 641 microbiome reconstitution restores bile acid mediated resistance to *Clostridium difficile*. *Nature*  
642 **517**:205–208.
- 643 38. **Wilson, K. H., M. J. Kennedy, and F. R. Fekety.** 1982. Use of sodium taurocholate to  
644 enhance spore recovery on a medium selective for *Clostridium difficile*. *Journal of Clinical*  
645 *Microbiology* **15**:443–446.
- 646 39. **Kozich, J., S. Westcott, N. Baxter, S. Highlander, and P. Schloss.** 2013. 16S Sequencing  
647 with the Illumina MiSeq Personal Sequencer. University of Michigan Health System SOP **3.1**:1–  
648 16.
- 649 40. **Lopez-Medina, E., M. M. Neubauer, G. B. Pier, and A. Y. Koh.** 2011. RNA isolation of  
650 *Pseudomonas aeruginosa* colonizing the murine gastrointestinal tract. *Journal of visualized*  
651 *experiments : JoVE* 6–9.
- 652 41. **Martin, M.** 2011. Cutadapt removes adapter sequences from high-throughput sequencing  
653 reads. *EMBnet* **17**:10.
- 654 42. **Joshi, N., and J. Fass.** 2011. Sickle: A sliding-window, adaptive, quality-based trimming  
655 tool for FastQ files (Version 1.33) [Software]. Available at <https://github.com/najoshi/sickle>.  
656 2011.
- 657 43. **Li, D., C. M. Liu, R. Luo, K. Sadakane, and T. W. Lam.** 2014. MEGAHIT: An ultra-fast  
658 single-node solution for large and complex metagenomics assembly via succinct de Bruijn  
659 graph. *Bioinformatics* **31**:1674–1676.
- 660 44. **Ogata, H., S. Goto, K. Sato, W. Fujibuchi, H. Bono, and M. Kanehisa.** 1999. KEGG:  
661 Kyoto encyclopedia of genes and genomes. U.S. Patent 1.
- 662 45. **Buchfink, B., C. Xie, and D. H. Huson.** 2015. Fast and sensitive protein alignment using  
663 DIAMOND. *Nature methods* **12**:59–60.

- 664 46. **Langmead, B.**, and **S. L. Salzberg**. 2012. Fast gapped-read alignment with Bowtie 2.  
665 Nature methods **9**:357–9.
- 666 47. **Li, H.**, **B. Handsaker**, **A. Wysoker**, **T. Fennell**, **J. Ruan**, **N. Homer**, **G. Marth**, **G.**  
667 **Abecasis**, and **R. Durbin**. 2009. The Sequence Alignment/Map format and SAMtools.  
668 Bioinformatics **25**:2078–2079.
- 669 48. **Oksanen, J.**, **F. G. Blanchet**, **M. Friendly**, **R. Kindt**, **P. Legendre**, **D. McGlinn**, **P. R.**  
670 **Minchin**, **R. B. O'Hara**, **G. L. Simpson**, **P. Solymos**, **M. H. H. Stevens**, **E. Szoecs**, and **H.**  
671 **Wagner**. 2018. vegan: Community Ecology Package.
- 672 49. **Giorgino, T.** 2009. Computing and Visualizing Dynamic Time Warping Alignments in R :  
673 The dtw Package. Journal of Statistical Software **31**:1–24.
- 674 50. **Breiman, L.** 2001. Random forests. Machine Learning **45**:5–32.



## 675 **Figure and Table Legends**

### 676 **Figure 1 | Distinct antibiotic pretreatments have differential impacts on *C. difficile*** 677 **colonization and cecal microbiota community structure.**

678 **(A)** *C. difficile* 630 CFU in stool of infected mice following each antibiotic-pretreated group over  
679 10 days of infection. Median and interquartile range are shown for each time point. Both  
680 cefoperzone and streptomycin pretreatments had more significantly detectable CFU on the final  
681 day of detectable CFU associated with clindamycin-pretreatment ( $p < 0.001$ ). **(B)** Relative  
682 abundance of family-level OTU taxonomic classification in each pretreatment group from 16S  
683 rRNA gene sequencing. **(C)** Quantification of terminal vegetative *C. difficile* CFU in cecal  
684 content across 18 hour colonization models. Black lines indicate median values and each  
685 pretreatment group had significantly greater detectable CFU than no antibiotic controls.  
686 Significant differences in A were determined through permANOVA with dynamic time warping  
687 and in C were found by Wilcoxon rank-sum test with Benjamni-Hochberg correction when  
688 necessary. The limit of detection was used in place of undetectable values for statistical testing.

### 689 **Figure 2 | Significant differences in cecal community structure and metabolomes track** 690 **with downstream *C. difficile* clearance across antibiotic pretreatment regimes.**

691 **(A)** NMDS ordination of Bray-Curtis distances of OTU relative abundances between mouse  
692 cecal communities that remained colonized by *C. difficile* and those that eventually cleared the  
693 infection. **(B)** Relative abundance of OTUs included the optimal model generated by AUCRF  
694 classifying the same groups as in panel A. Species-level identification was obtained using  
695 centroid representative sequences for each OTU. **(C)** NMDS ordination of Bray-Curtis distances  
696 using metabolite intensities between the aforementioned groups of animals. **(D)** Scaled intensity  
697 of metabolites included the optimal model generated by AUCRF classifying colonized and  
698 clearing mouse cecal microbiomes. Differences for ordinations in A & C were calculated using

699 permANOVA. Optimal AUCRF models demonstrated 0% out of bag error, and significant  
700 differences in B & D were determined by Wilcoxon rank-sum test with Benjamni-Hochberg  
701 correction.

702 **Figure 3 | *C. difficile* colonization alters gene transcription of taxonomic groups**  
703 **differentially between antibiotic pretreatments.**

704 Each point represents a unique gene from the respective metagenomic assembly. Coordinates  
705 were determined by the  $\log_2$ -transformed difference in transcription level between *C. difficile*-  
706 infected and mock-infected conditions for each gene. Outliers were defined using linear  
707 correlation and a squared residual cutoff of 2. Distance of outliers to the x=y line were also  
708 calculated and represented in unites of deviation or UD. The coloring of each point indicates the  
709 genus that the transcript originated from and the and the gray points denote those genes with  
710 consistent transcription levels between conditions as defined by outlier analysis. Antibiotic  
711 pretreatments; **(A)** Streptomycin-pretreated, **(B)** Cefoperazone-pretreated, and **(C)** Clindamycin-  
712 pretreated.

713 **Figure 4 | A majority of metatranscriptomic changes are focused within minority**  
714 **members of each microbiota.**

715 Absolute difference in metatranscriptomic reads contributed by each genus in pretreatments  
716 between mock and *C. difficile*-infected conditions. Colored lines denoted antibiotic pretreatment.  
717 Each point represents all transcript contributed by that genus in each pretreatment group.  
718 Numbers at the base of pretreatment lines in the first panel represent the quantity of genera in  
719 each group as some points are obscured.

720 **Figure 5 | Metatranscriptomic changes due to infection in certain metabolic pathways are**  
721 **overrepresented in the minority taxa.**

722 Log<sub>2</sub> metagenome-normalized cDNA abundances for genes with differential transcription during  
723 infection belonging to genera that had a relative abundance greater than 0.1%. Double asterisks  
724 denotes genes shared between pretreatment groups.

725 **Supplementary Figure 1 | Conserved markers of *C. difficile* colonization susceptibility in**  
726 **mouse cecal microbiomes.**

727 **(A)** NMDS ordination of Bray-Curtis distances of OTU relative abundances between mouse  
728 cecal communities that are susceptible to colonization by *C. difficile* and those that are resistant.

729 **(B)** Relative abundance of OTUs included in the optimal model generated by AUCRF classifying  
730 the same groups as in panel A, labeled with the finest resolution provided by classifying to the  
731 RDP reference database. **(C)** NMDS ordination of Bray-Curtis distances between metabolite

732 intensities. **(D)** Scaled metabolites relative abundances included the optimal model generated  
733 by AUCRF classifying resistant and susceptible cecal microbiomes. Significant differences in A  
734 & C were also calculated using permANOVA. The AUCRF models generated in this analysis  
735 also had 0% out of bag error and significant differences in B & D were calculated as in Figure 2.

736 **Supplementary Figure 2 | Signatures of infection effect on the cecal microbiomes**  
737 **conserved across pretreatment groups.**

738 **(A)** NMDS ordination of Bray-Curtis distances of OTU relative abundances between antibiotic-  
739 pretreated mouse cecal communities that are either *C. difficile*-colonized or mock-infected. **(B)**

740 Relative abundance of OTUs included the optimal model generated by AUCRF classifying the  
741 same groups as in panel A. **(C)** NMDS ordination of Bray-Curtis distances using metabolite  
742 intensities between the same classes. **(D)** Scaled intensity of metabolites included the optimal

743 model classifying infected and uninfected cecal microbiomes. Statistical differences were  
744 performed as in Figure 2.

745 **Supplementary Figure 3 | Relative concentrations of select *C. difficile* Stickland**  
746 **fermentation metabolites across infection models.**

747 Metabolites included in this analysis were chosen based on their previously published  
748 interaction with *C. difficile* Stickland fermentation: **(A)** Proline, **(B)** 4-Hydroxyproline, **(C)** Glycine,  
749 **(D)** 5-Aminovalerate. Significant differences were determined by Wilcoxon rank-sum test with  
750 Benjamini-Hochberg correction when necessary. Black asterisks in the plotting area represent  
751 within group differences, while green asterisks along the top border denote significant  
752 differences compared to untreated control.

753 **Supplementary Figure 4 | Unique genes with functional annotation detectable within each**  
754 **metagenome and metatranscriptome.**

755 Genes in each datasets were derived from respective metagenomic assemblies, with only those  
756 genes that mapped to a KEGG pathway-level annotation: **(A)** Untreated, **(B)** Streptomycin-  
757 pretreated, **(C)** Cefoperazone-pretreated, and **(D)** Clindamycin-pretreated mice. Each panel  
758 includes that treatments' unique genes from metagenomic assembly and genes that recruited at  
759 least one cDNA read from the corresponding metatranscriptomes. Collector's curves from  
760 rarefaction analysis of reads mapped to genes from **(E)** metagenomes and **(F)**  
761 metatranscriptomes.

762 **Supplementary Table 1 | Antibiotic pretreatment regime summaries.**

763 Antibiotic classes, mechanisms, and dosage information for each pretreatment. Quantified effect  
764 on alpha- and beta-diversities of the cecal microbiota are also included.

765 **Supplementary Table 2 | Summary of impact of infection on cecal community structure**  
766 **and metabolome.**

767 Global effect as well as changes to specific metabolites are included.

768 **Supplementary Table 3 | Summary statistics for datasets containing replicates generated**  
769 **during this study.**

770 **Supplementary Table 4 | High-throughput sequencing read counts and metagenomic**  
771 **assembly.**

772 Raw and curated read abundances for both metagenomic and metatranscriptomic sequencing  
773 efforts. Raw read curation steps are outlined in Materials & Methods. Metagenomic contig  
774 summary statistics reflect the quality of assembly for each group.

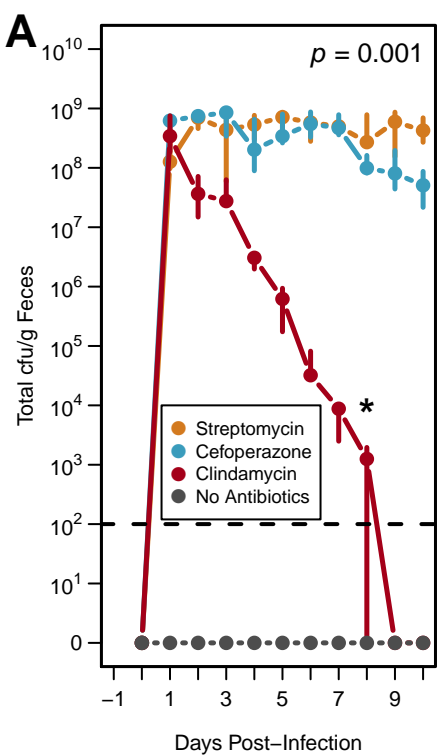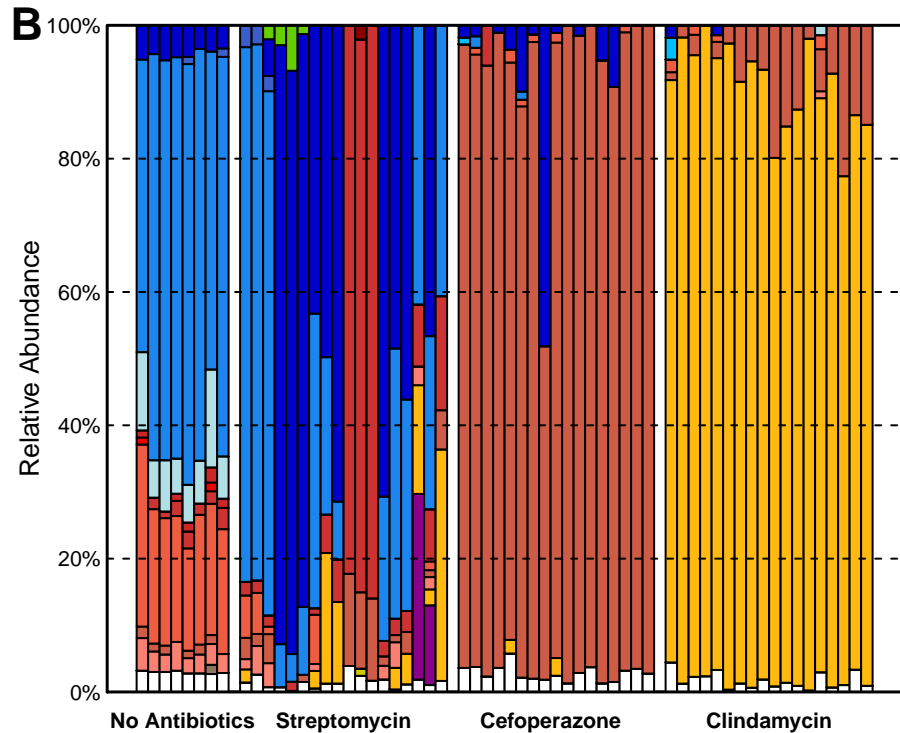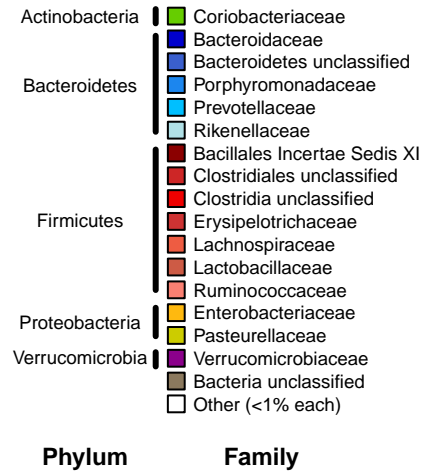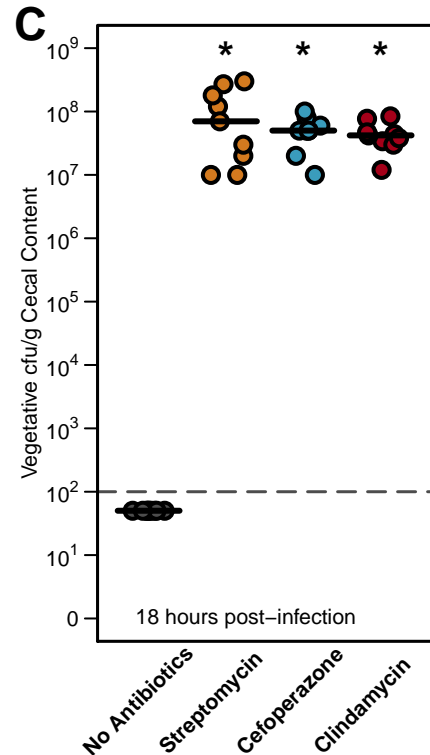

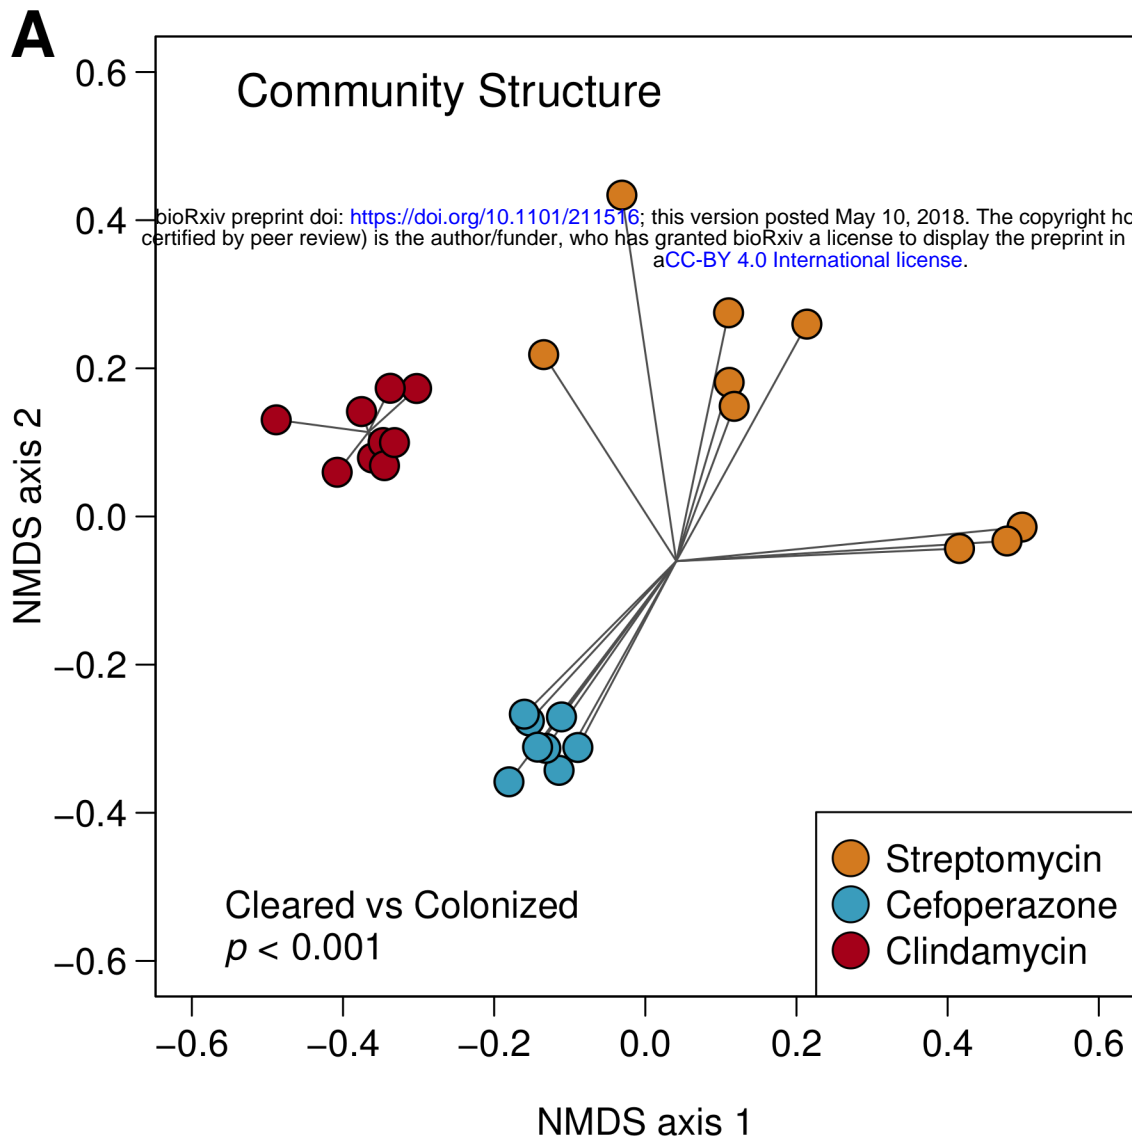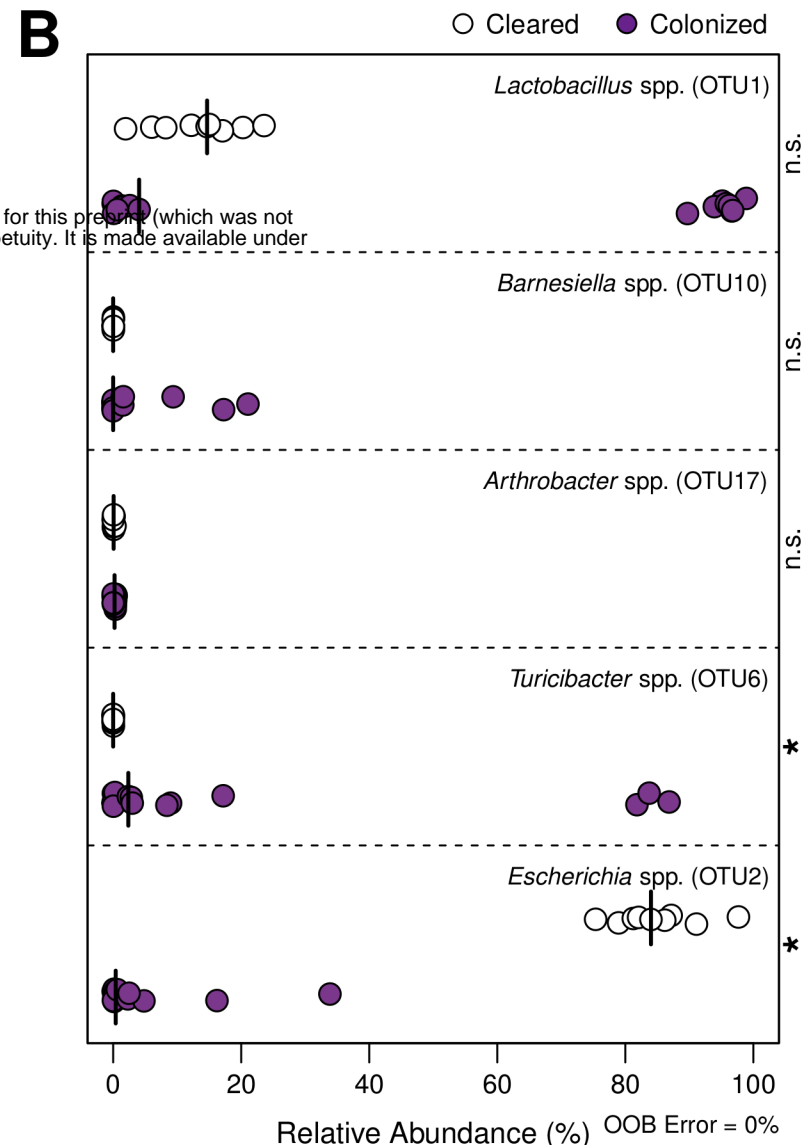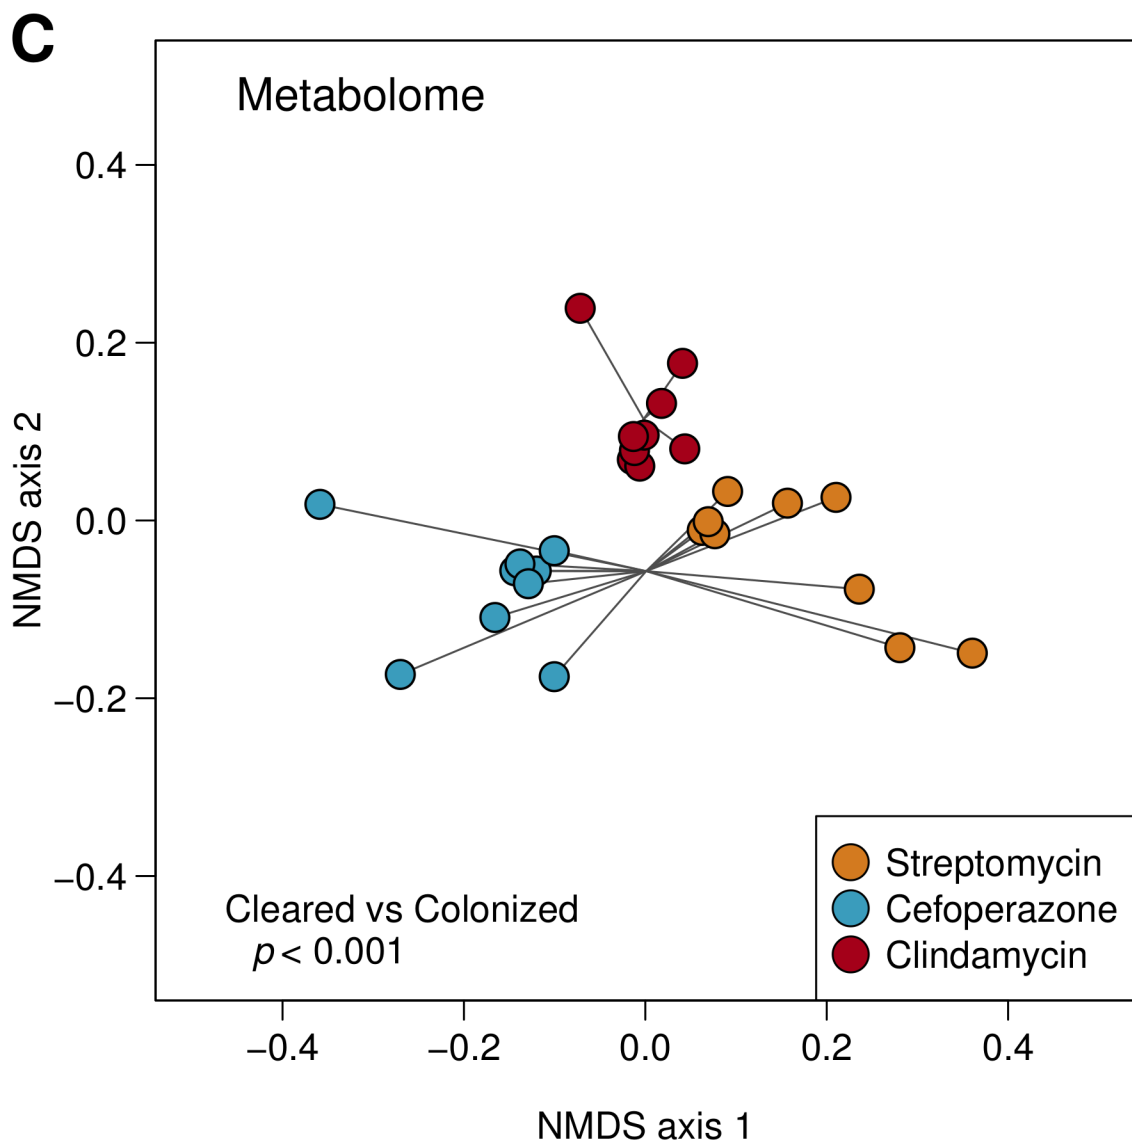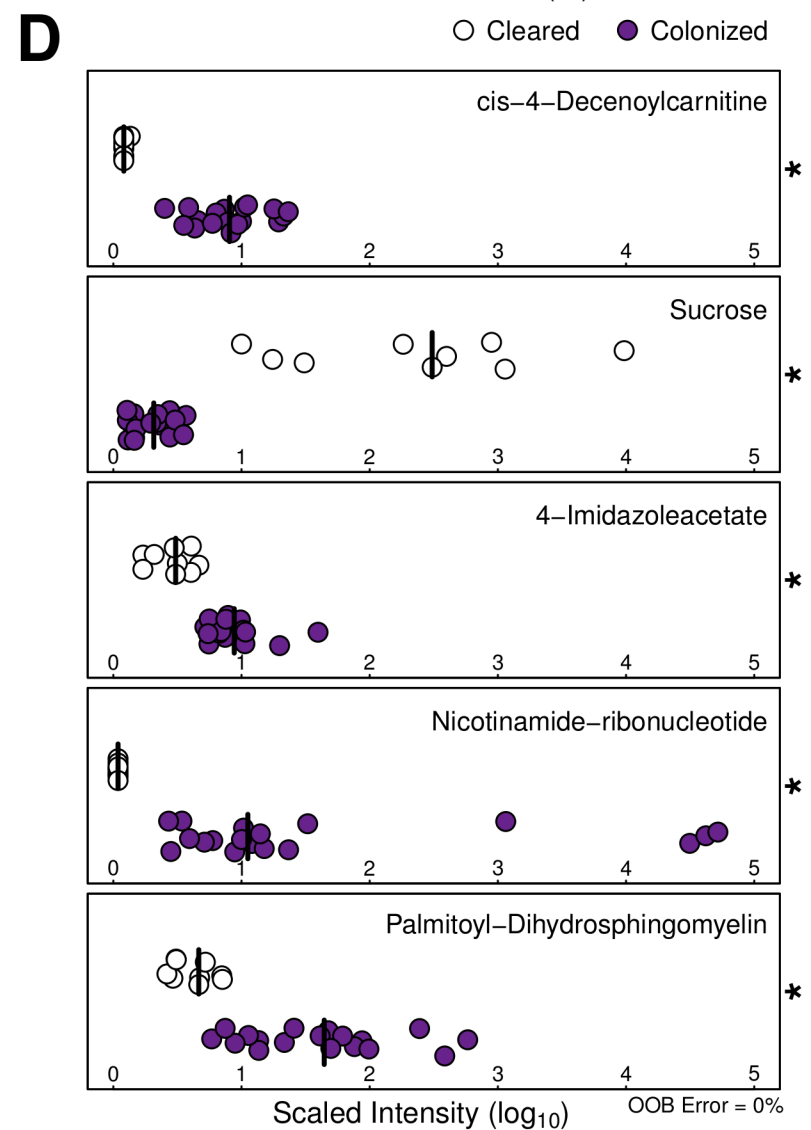

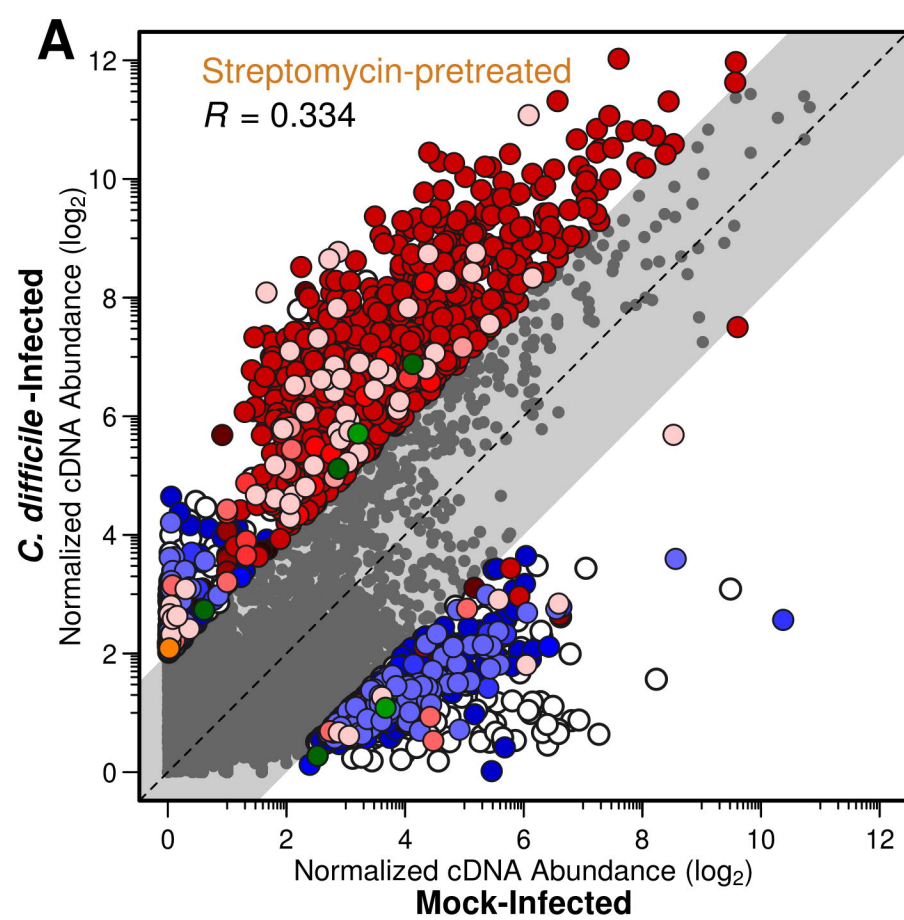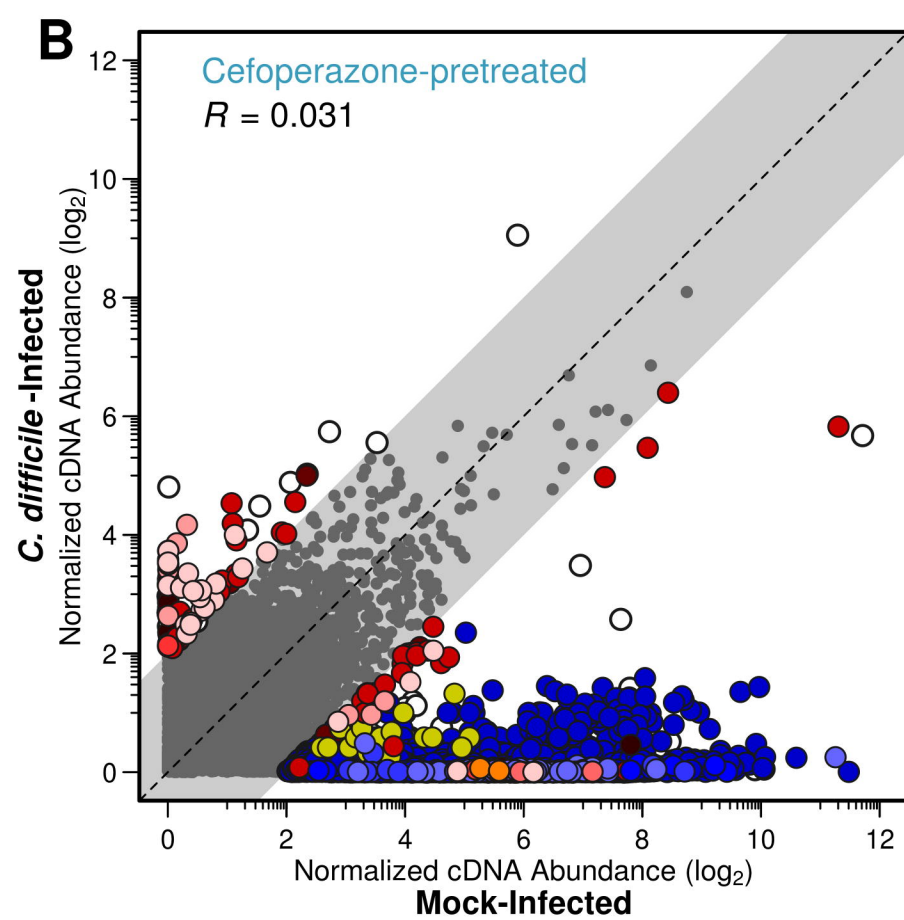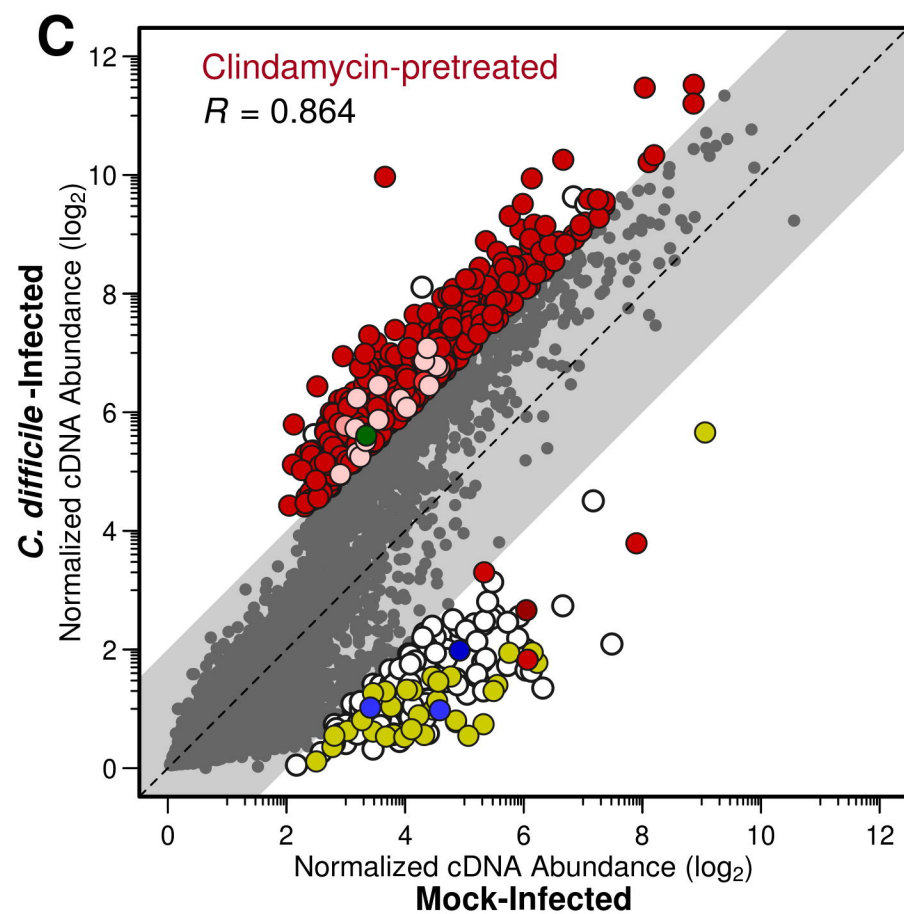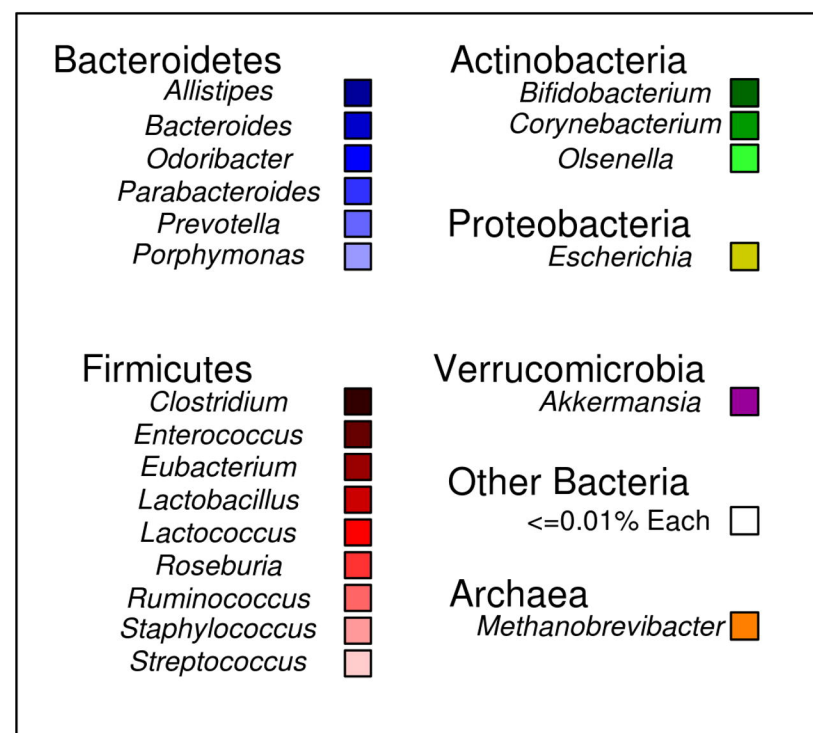



Streptomycin-pretreated Cefoperazone-pretreated Clindamycin-pretreated

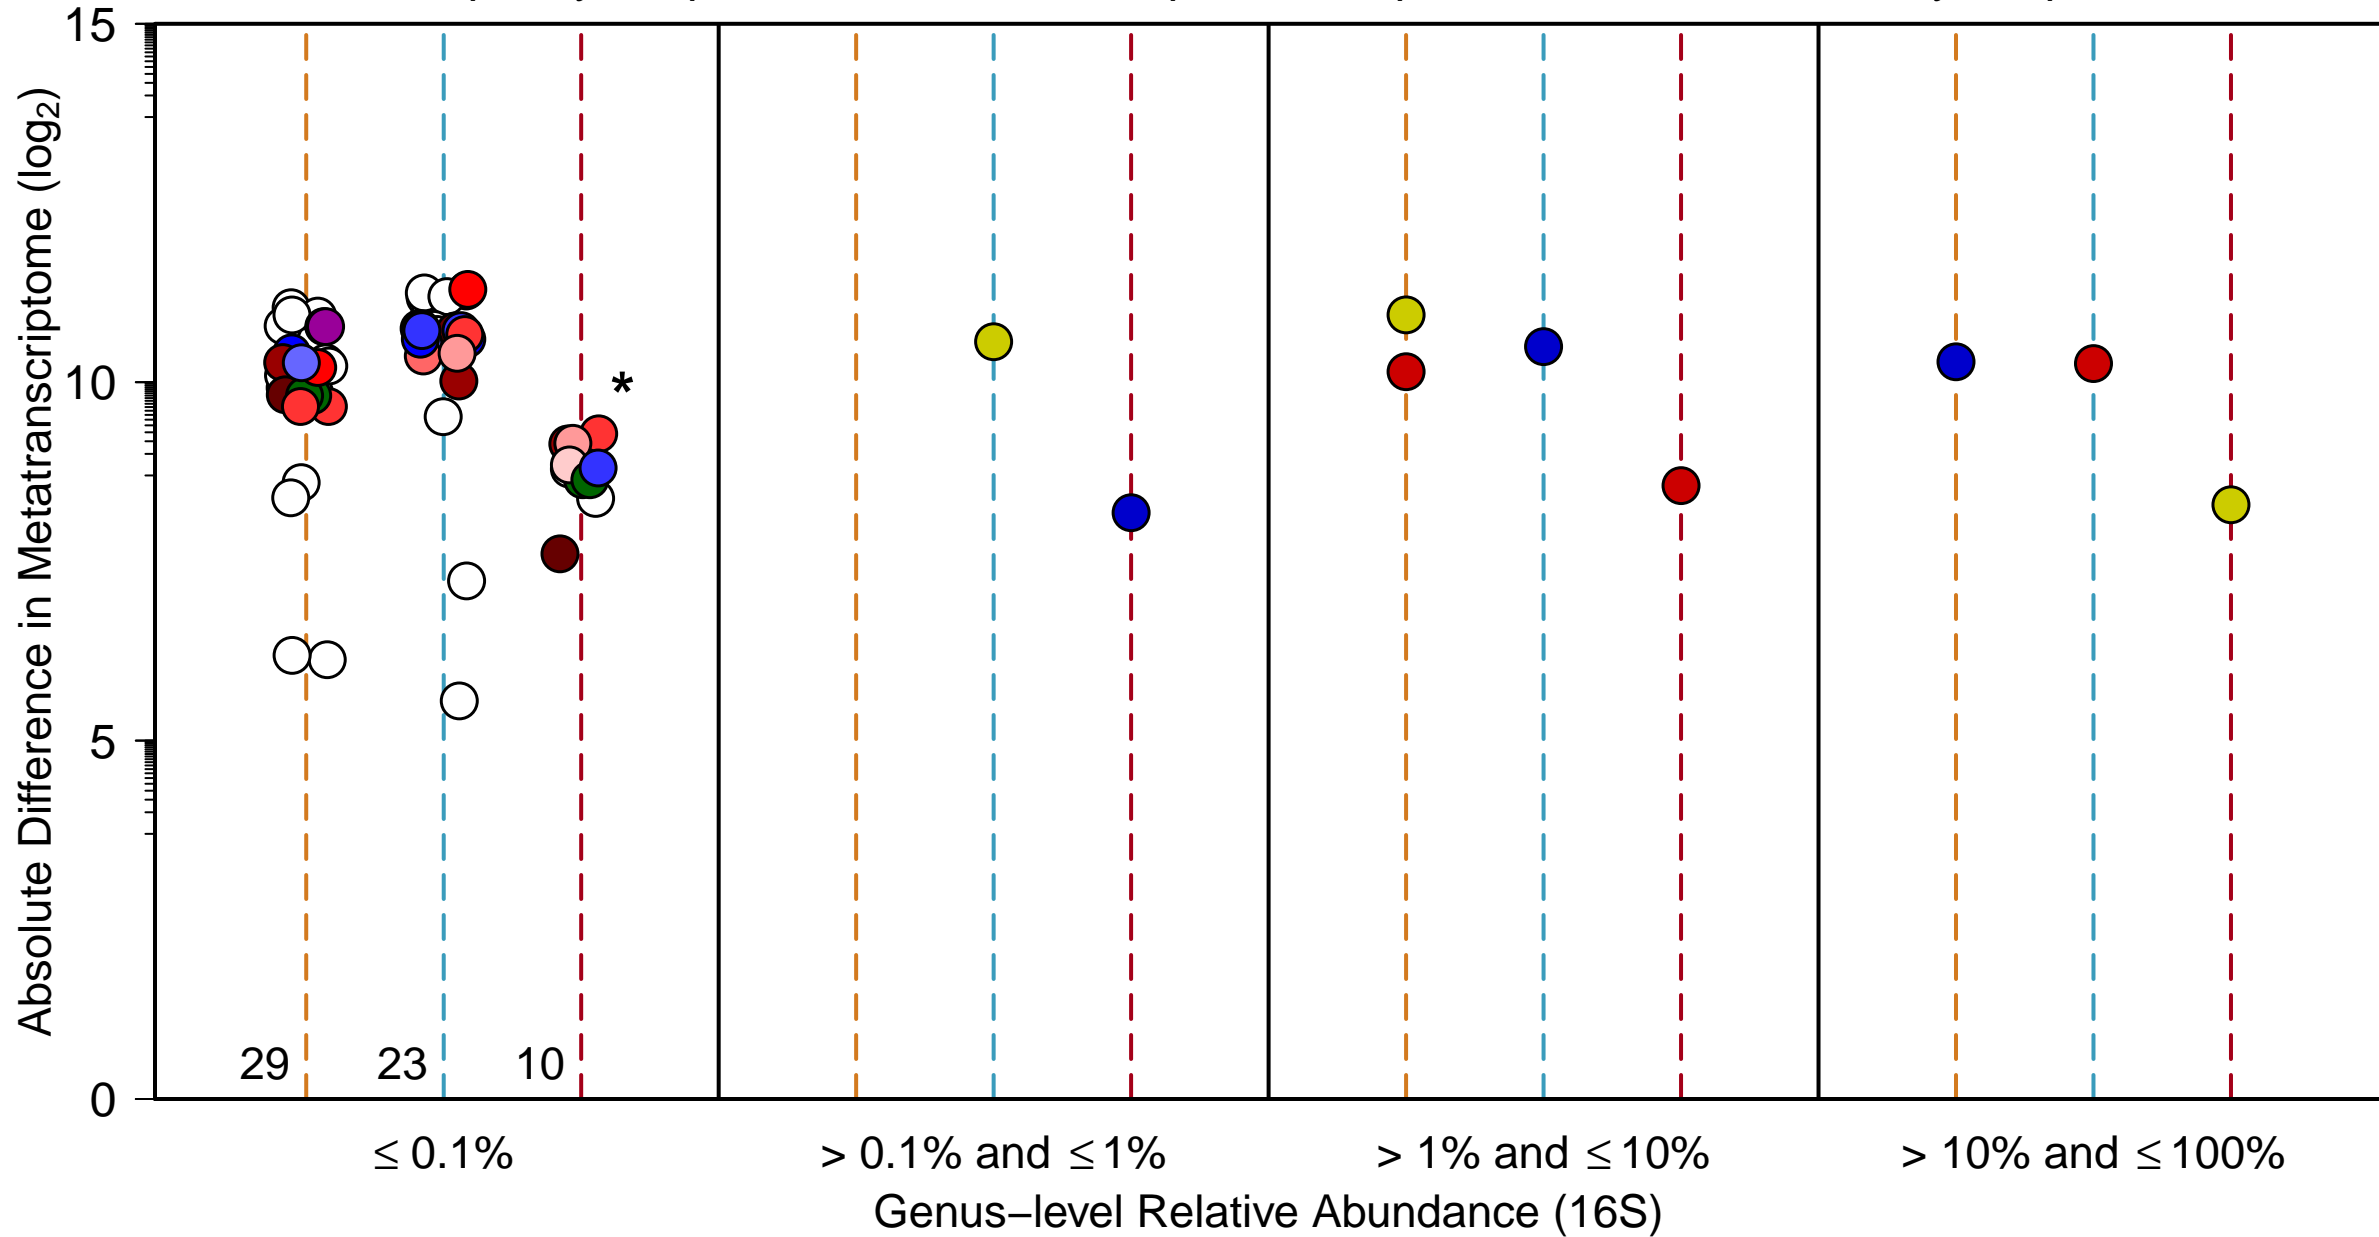

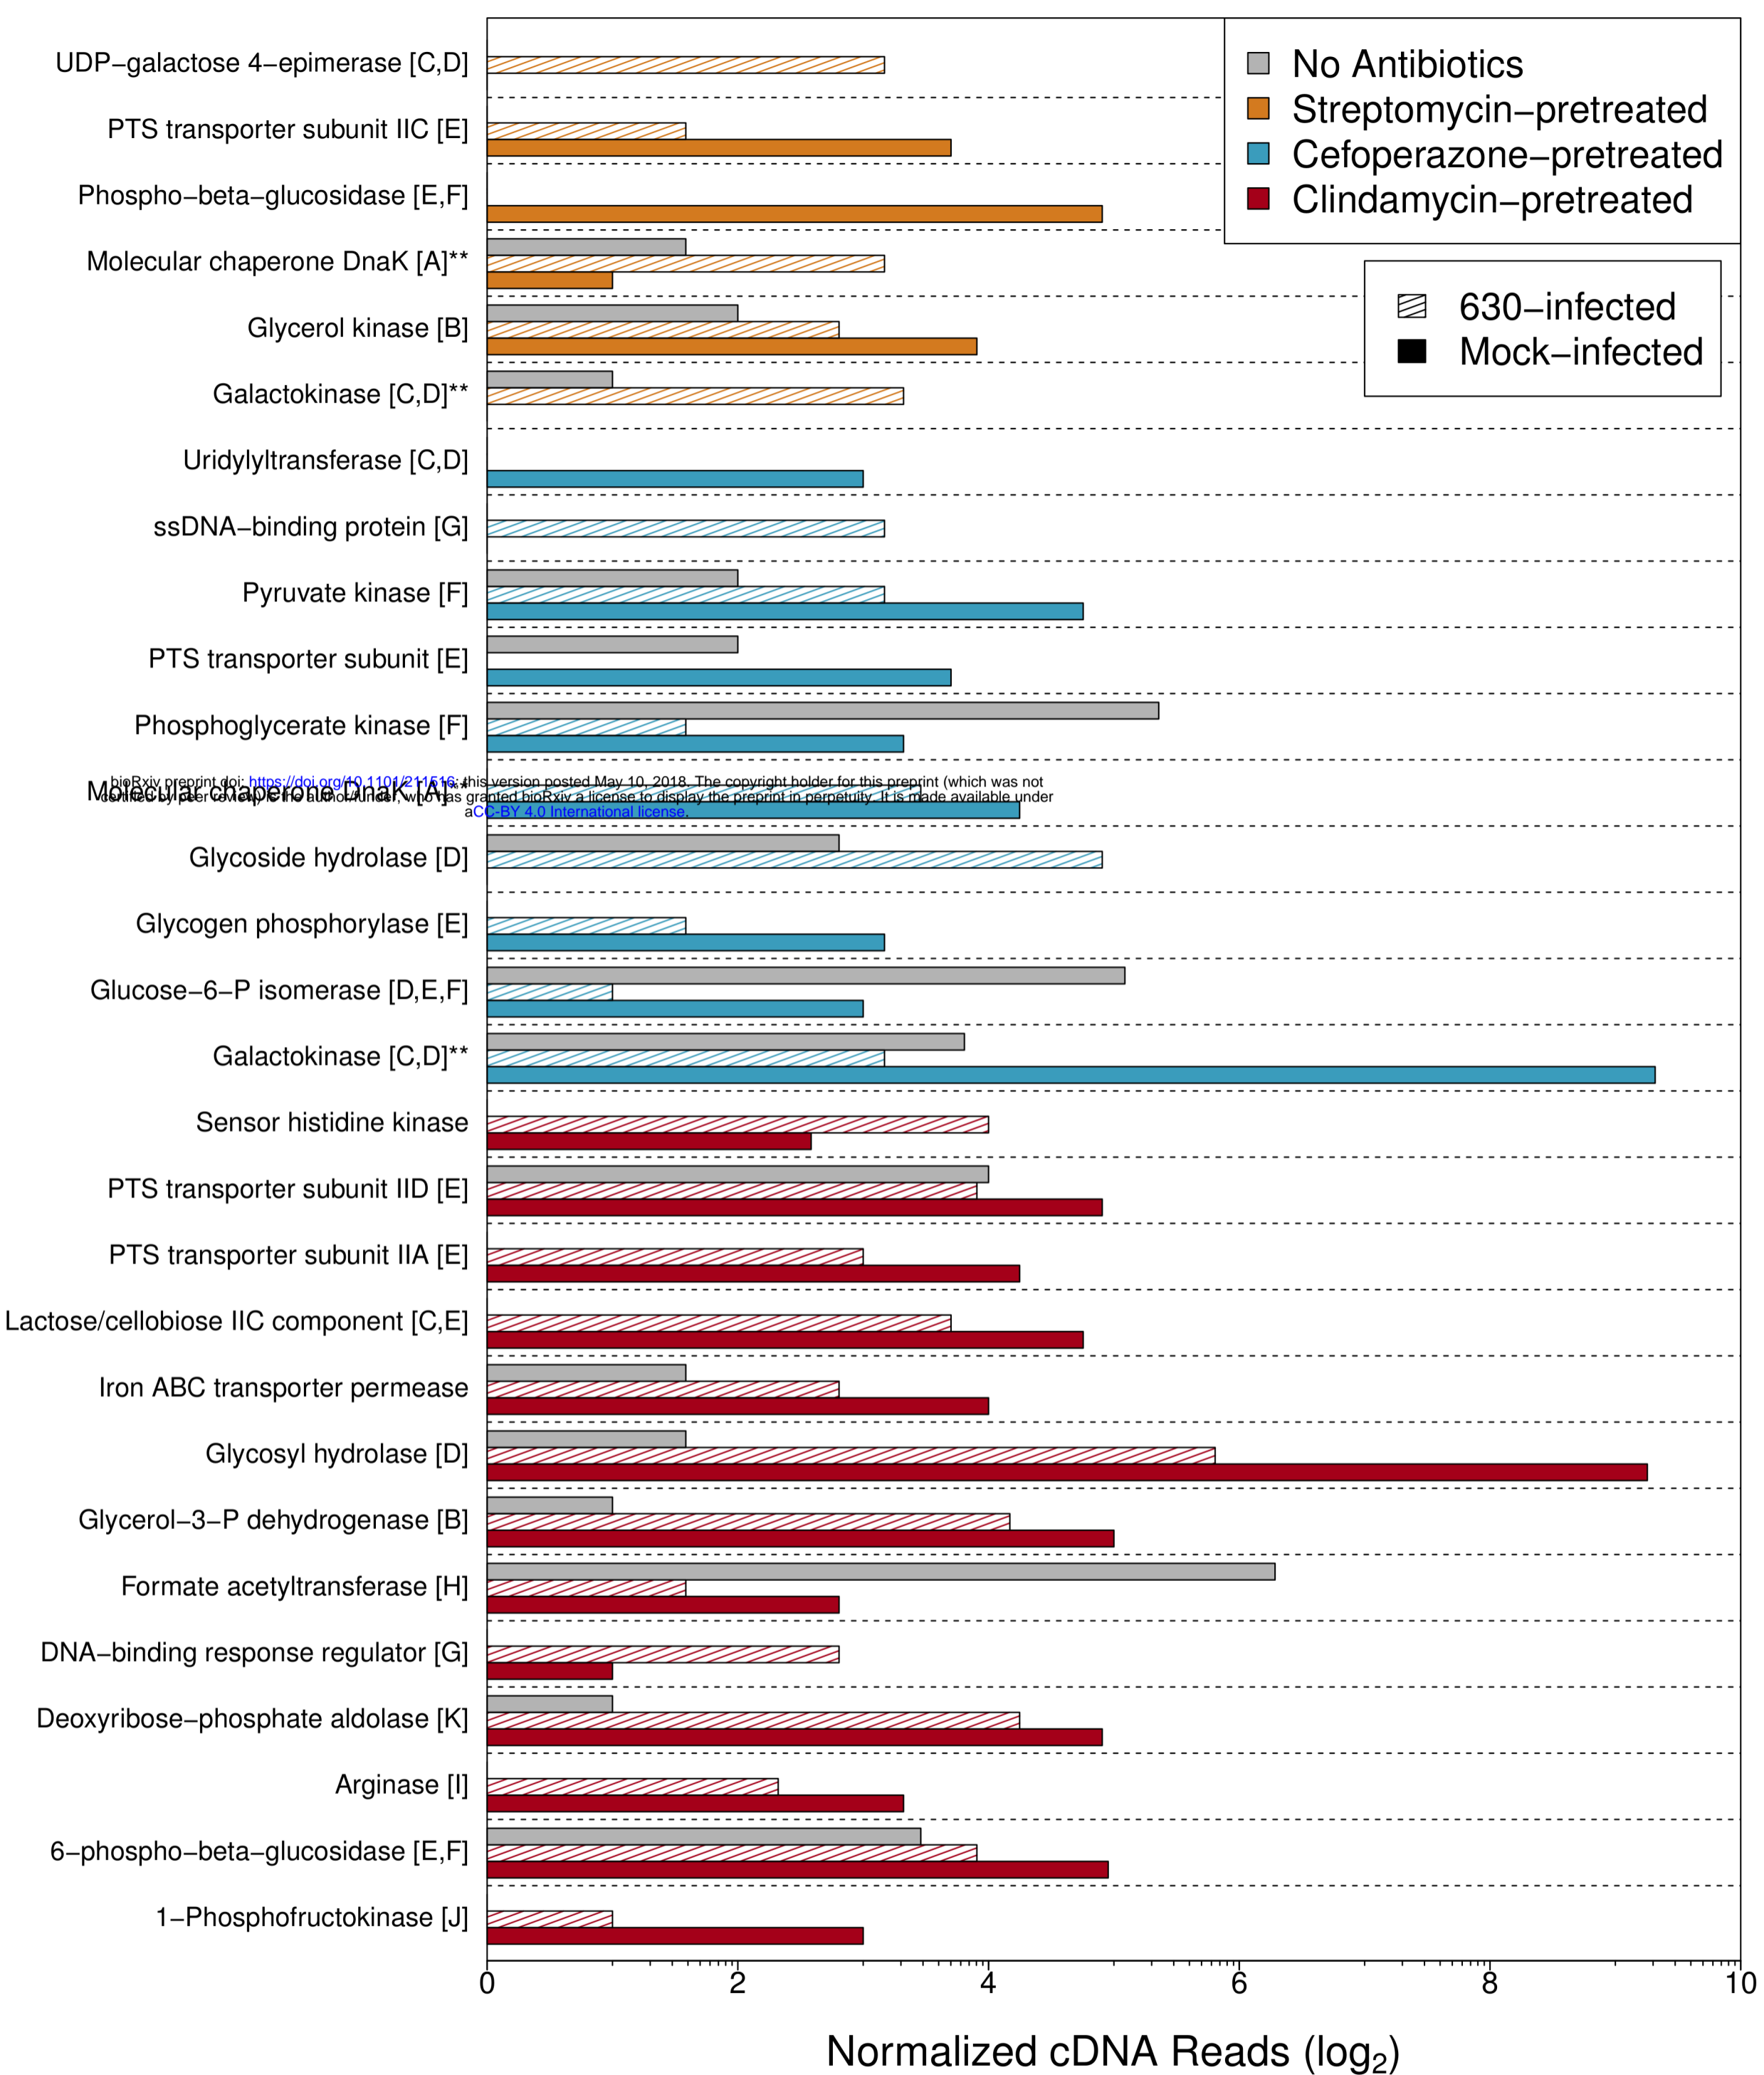

A. RNA degradation

B. Glycerolipid metabolism

C. Galactose metabolism

D. Amino sugar and nucleotide sugar metabolism

E. Starch and sucrose metabolism

F. Glycolysis / Gluconeogenesis

G. DNA replication

H. Butanoate / Propanoate metabolism

I. Arginine and proline metabolism

J. Fructose and mannose metabolism

K. Pentose phosphate pathway
